1 **Lymphotoxin  $\beta$  receptor: A crucial role in innate and adaptive immune responses against**  
2 ***Toxoplasma gondii***

3 Anne Tersteegen<sup>1, 4</sup>, Ursula R. Sorg<sup>1</sup>, Richard Virgen-Slane<sup>2</sup>, Marcel Helle<sup>1</sup>, Patrick Petzsch<sup>3</sup>, Ildiko R.  
4 Dunay<sup>4</sup>, Karl Köhrer<sup>3</sup>, Daniel Degrandi<sup>1</sup>, Carl F. Ware<sup>2</sup>, Klaus Pfeffer<sup>1\*</sup>

5 <sup>1</sup>Institute of Medical Microbiology and Hospital Hygiene, Heinrich Heine University, Düsseldorf,  
6 Germany. <sup>2</sup>Laboratory of Molecular Immunology, Infectious and Inflammatory Diseases Center,  
7 Sanford Burnham Prebys Medical Discovery Institute, La Jolla, CA 92037. <sup>3</sup>Biological and Medical  
8 Research Center (BMFZ), Heinrich Heine University, Düsseldorf, Germany. <sup>4</sup>Institute of Inflammation  
9 and Neurodegeneration, Otto-von-Guericke-University, Magdeburg, Germany

10 \*e-mail: [klaus.pfeffer@hhu.de](mailto:klaus.pfeffer@hhu.de)

11

12

13 **Abstract**

14 The LT $\beta$ R plays an essential role in the initiation of immune responses to intracellular pathogens. In  
15 mice, the LT $\beta$ R is crucial for surviving acute toxoplasmosis, however, up to now a functional analysis  
16 is largely incomplete. Here, we demonstrate that the LT $\beta$ R is a key regulator required for the intricate  
17 balance of adaptive immune responses. *T. gondii* infected LT $\beta$ R<sup>-/-</sup> mice show globally altered IFN $\gamma$   
18 regulation, reduced IFN $\gamma$ -controlled host effector molecule expression, impaired T cell functionality  
19 and an absent anti-parasite specific IgG response resulting in a severe loss of immune control of the  
20 parasites. Reconstitution of LT $\beta$ R<sup>-/-</sup> mice with toxoplasma immune serum significantly prolongs the  
21 survival following *T. gondii* infection. Notably, analysis of RNAseq data clearly indicates a specific  
22 effect of *T. gondii* infection on the B cell response and isotype switching. This study unfolds the  
23 decisive role of the LT $\beta$ R in cytokine regulation and adaptive immune responses to control *T. gondii*.

24

25 **Introduction**

26 The lymphotoxin  $\beta$  receptor (LT $\beta$ R) is one of the core members of the tumor necrosis factor  
27 (TNF)/TNF receptor (TNFR) superfamily (1, 2). It has two cognate ligands, LT $\beta$  (LT $\alpha_1\beta_2$ ) and LIGHT  
28 (homologous to lymphotoxins, exhibits inducible expression, and competes with HSV glycoprotein D  
29 for herpes virus entry mediator [HVEM], a receptor expressed by T lymphocytes) (3, 4). LT $\beta$ R  
30 mediated signaling is known to be essential for the organogenesis of secondary lymphoid tissues, the

31 maintenance of their structure and its role in mediating innate immune responses to many  
32 pathogens is also well documented (2, 5-7). LT $\beta$ R deficient (LT $\beta$ R<sup>-/-</sup>) mice lack of lymph nodes (LNs)  
33 and Peyer's patches (PPs) and show reduced numbers of natural killer (NK) and dendritic cells (DCs)  
34 as well as impaired immunoglobulin (Ig) affinity maturation (7, 8). In infection models, LT $\beta$ R<sup>-/-</sup> mice  
35 show pronounced defects in their immune response against *Listeria monocytogenes*, *Mycobacterium*  
36 *tuberculosis* (5), cytomegalovirus (9), LCMV (10) and Zika virus (11) as well as *Toxoplasma gondii*  
37 (*T. gondii*) (12). In spite of these extensive deficits, not much is known about the exact role of LT $\beta$ R  
38 signaling for an efficient generation of the immune response against pathogens.

39 *T. gondii*, the causative agent of toxoplasmosis, is an obligate intracellular parasite belonging to the  
40 Apicomplexa. It is able to invade most warm-blooded vertebrates including humans (13, 14) and can  
41 infect all nucleated cells. While acute toxoplasmosis usually presents with only mild, flu-like  
42 symptoms in immunocompetent hosts, it sometimes manifests as lymphadenitis,  
43 hepatosplenomegaly, myocarditis or pneumonia. In immunocompromised patients toxoplasmosis  
44 can cause serious health problems and, when primary infection occurs during pregnancy, severe  
45 congenital defects may occur (15-17).

46 The early immune response to *T. gondii* is characterized by recognition of *T. gondii* associated  
47 molecules (i.a. profilin) by different cell types such as DCs. These cells produce distinct cytokines in  
48 response to infection such as IL-12 and TNF thus activating and stimulating other cell types including  
49 NK cells (18), T cells (19), ILCs (20), and macrophages (21) which in turn produce inflammatory  
50 cytokines such as IFN $\gamma$ .

51 IFN $\gamma$  signalling is essential for limiting *T. gondii* proliferation during the acute stage of toxoplasmosis  
52 and driving the parasite into the chronic stage where it is contained by a functional immune response  
53 (22-25). IFN $\gamma$  driven effector mechanisms include induction of cell-autonomous effector mechanisms  
54 (26, 27), such as depletion of tryptophan (28) and reactive nitrogen production (29) which suppress  
55 *T. gondii* replication and are essential for restricting parasite growth. IFN $\gamma$  also strongly induces

56 murine Guanylate-Binding Proteins (mGBPs) which play a major role in restricting parasite growth of  
57 *T. gondii* as well as other intracellular pathogens (30-33). Within an infected cell, *T. gondii* resides  
58 within a parasitophorous vacuole (PV) that effectively protects the parasite from lysosomal activity  
59 (34). mGBPs are recruited to the PV and are instrumental in destroying first the PV and then the  
60 parasites within (30, 31, 33, 35, 36).

61 Previous studies have shown that other core members of the TNF/TNFR superfamily such as the  
62 ligands TNF, LT $\alpha$  which signal via the TNFR1 receptor also play an important part in the immune  
63 response to *T. gondii* (25, 37, 38). However, there is only limited data published on the role of the  
64 LT $\beta$ R: It has been demonstrated that signaling via the LT $\beta$ R is essential for the up-regulation of  
65 mGBPs after *T. gondii* infection as well as for overall survival (12). Glatman Zaretsky et al. have shown  
66 that LT $\beta$  signaling is important for maintaining intact splenic architecture and, indirectly, for efficient  
67 *T. gondii* specific antibody production (39). Nevertheless, the pathophysiology responsible for the  
68 increased susceptibility of LT $\beta$ R<sup>-/-</sup> mice to *T. gondii* infection is still elusive.

69 Here, we demonstrate that LT $\beta$ R deficiency results in dramatically dysregulated IFN $\gamma$  responses,  
70 impaired expression of anti-parasite effector molecules, limited T cell functionality and an abrogated  
71 *T. gondii* specific IgG response. We show that by transfer of *T. gondii* immune serum survival of  
72 LT $\beta$ R<sup>-/-</sup> mice can be prolonged, demonstrating that the susceptibility of LT $\beta$ R<sup>-/-</sup> mice to *T. gondii*  
73 infection is possibly due to a direct role of LT $\beta$ R signaling in Ig class switch. These results lead to a new  
74 understanding of LT $\beta$ R mediated immunity and the pathophysiology of toxoplasmosis and will  
75 hopefully aid in developing much needed new treatment and prevention options such as passive  
76 vaccination strategies for human toxoplasmosis.

77

## 78 **Results**

79 **LT $\beta$ R deficiency leads to increased parasite burden in lung, spleen and muscle.** While wildtype  
80 C57BL/6 (WT) mice survive a *T. gondii* infection, LT $\beta$ R<sup>-/-</sup> mice are highly susceptible to *T. gondii*

81 infection and do not survive beyond day 14 *p.i.* (Fig. 1a). This high susceptibility is in accordance with  
82 our previous study (12). To characterize the cause of this susceptibility in  $LT\beta R^{-/-}$  mice we first  
83 assessed the parasite burden in *T. gondii* infected WT and  $LT\beta R^{-/-}$  animals during the acute phase of  
84 infection via qRT-PCR (Fig. 1b). In lung tissue, we found increasing amounts of *T. gondii* DNA up to day  
85 10 *p.i.* in both cohorts with significantly higher amounts in  $LT\beta R^{-/-}$  compared to WT mice on day 10  
86 *p.i.* In the spleen *T. gondii* DNA amounts increased only moderately in WT mice through the course of  
87 infection (Fig. 1b). In contrast,  $LT\beta R^{-/-}$  mice showed a significant increase of *T. gondii* DNA by day 10  
88 *p.i.* and also significantly increased amounts compared to WT mice on days 7 and 10 *p.i.* Interestingly,  
89 in both genotypes reduced amounts of *T. gondii* DNA could be detected on day 10 compared to day 7  
90 *p.i.* Similar results were observed in muscle tissue (Fig. 1b). In WT mice, the parasite burden rose only  
91 moderately, while  $LT\beta R^{-/-}$  mice showed a significant increase by day 10 *p.i.* as well as significantly  
92 higher amounts on days 7 and 10 *p.i.* compared to WT mice. To summarize,  $LT\beta R^{-/-}$  mice showed  
93 increased parasite burden compared to WT mice pointing towards a failure of these animals to  
94 adequately control parasite proliferation in the acute phase of infection.

95 **Dysregulated cytokines in the serum of  $LT\beta R^{-/-}$  mice after infection with *T. gondii*.** Since cytokines,  
96 especially IFN $\gamma$  and TNF $\alpha$  as signature molecules of a Th1 response play an important role in  
97 containing *T. gondii* expansion (16, 22, 40), we analyzed cytokine amounts in sera of infected mice  
98 (Fig. 1c). In both genotypes IFN $\gamma$  amounts increased slightly by day 4 *p.i.* In WT animals, IFN $\gamma$  amounts  
99 increased significantly by day 7 *p.i.* but was found to be markedly decreased again on day 10 *p.i.*  
100 While  $LT\beta R^{-/-}$  mice also showed a significant increase of IFN $\gamma$  expression on day 7 *p.i.*, amounts were  
101 significantly lower than those of WT animals. Also, in  $LT\beta R^{-/-}$  mice IFN $\gamma$  expression levels were  
102 significantly higher on day 10 *p.i.* compared to WT animals. TNF $\alpha$  expression increased significantly in  
103 WT as well as  $LT\beta R^{-/-}$  animals by day 10 *p.i.* and did not differ significantly between the two  
104 genotypes, although amounts in  $LT\beta R^{-/-}$  mice seemed to rise more steeply later in infection (day 7 vs.  
105 day 10 *p.i.* for WT and  $LT\beta R^{-/-}$  mice, respectively).

106 In WT animals expression of IL-6, another proinflammatory cytokine (41), was slightly increased on  
107 day 4 and day 7 *p.i.* but was reduced again on day 10 *p.i.* (Fig. 1c). In contrast, in  $LT\beta R^{-/-}$  mice IL-6  
108 amounts rose significantly during the course of infection and were significantly higher on days 7 and  
109 10 *p.i.* compared to WT mice. Amounts of IL-10, known for its anti-inflammatory properties during  
110 infection (42), did not change significantly in WT animals during the course of infection (Fig. 1c). In  
111 contrast, amounts in  $LT\beta R^{-/-}$  animals rose significantly on day 10 *p.i.* and were significantly higher  
112 compared to WT mice. The monocyte chemotactic factor (CCL2), a chemokine described to be  
113 induced by *T. gondii* (43), increased in WT as well as  $LT\beta R^{-/-}$  mice on days 4 and 7 *p.i.* But while CCL2 in  
114 WT mice declined again by day 10 *p.i.*, CCL2 further increased in  $LT\beta R^{-/-}$  mice on day 10 *p.i.* and were  
115 significantly higher than in WT mice (Fig. 1c). Interestingly,  $LT\beta R^{-/-}$  mice showed increased baseline  
116 amounts (day 0) for IFN $\gamma$ , TNF $\alpha$ , IL-6, and CCL2 compared to WT mice, even though these differences  
117 were not significant.

118 Significantly different amounts were detected for IFN $\beta$ , IL-1 $\alpha$ , IL-23, and IL-27 only on day 4 *p.i.*  
119 (Suppl. Fig. 1).  $LT\beta R^{-/-}$  animals showed increased baseline amounts (d0) for IFN $\beta$ , IL-1 $\alpha$ , IL-1 $\beta$ , IL-17A,  
120 IL-23, IL-27, and IL-12p70, which were however significant only in the case of IL-1 $\beta$ . No differences in  
121 IL-12p70 levels could be detected for the two genotypes (Suppl. Fig. 1).

122 To summarize, uninfected  $LT\beta R^{-/-}$  mice show different baseline amounts of proinflammatory  
123 cytokines suggesting a subtle activation of the immune system. Furthermore, in these animals the  
124 coordinated immune defense during *T. gondii* infection is dysregulated.

125 **Markedly altered transcriptome in the lungs of  $LT\beta R^{-/-}$  mice after *T. gondii* infection.** The lungs are  
126 one of the target organs of *T. gondii* tachyzoite dissemination (12, 44). In line with that observation,  
127 we detected high amounts of *T. gondii* DNA in lung tissue of  $LT\beta R^{-/-}$  compared to WT mice on day 4  
128 *p.i.* (Fig. 1b). To determine whether WT and  $LT\beta R^{-/-}$  mice show differences in global gene expression  
129 patterns in the lungs, we analyzed lung tissue via RNAseq on day 7 *p.i.* Interestingly, gene set  
130 enrichment analysis (GSEA) of these data showed a significant upregulation of GO (biological process)

131 molecular signatures for 'RESPONSE TO TYPE I INTERFERONS, RESPONSE TO INTERFERON GAMMA, and INTERFERON  
132 GAMMA MEDIATED SIGNALING PATHWAY' in *T. gondii* infected WT compared to  $LT\beta R^{-/-}$  mice on day 7 *p.i.*  
133 (Suppl. Fig. 2). The data depicted by a volcano plot (Fig. 2a) clearly shows a significant upregulation of  
134 IFN $\gamma$ -regulated genes in *T. gondii* infected WT mice as compared to  $LT\beta R^{-/-}$  mice (day 7 *p.i.*): For  
135 instance, transcripts for mGBPs (mGBP2b/1, 2, 6, 7, and 10), transcripts for effector molecules (IDO1,  
136 Gzmk), transcripts for chemokines and chemokine receptors responsible for recruitment of immune  
137 cells (CCL2, CCL4, CCL7, CXCL9, CXCL10, CCR1), transcripts for proteins involved in IFN $\gamma$ -signaling  
138 (IRF1, STAT1), transcripts induced by IFN $\gamma$  (TGTP1, PIM1) and other transcripts known to be involved  
139 in immune responses (CD274, IL12Rb1, Ly6i, Ly6c2, MMP8, RNF19b) were found to be highly  
140 expressed in infected WT, but not in  $LT\beta R^{-/-}$  lungs on day 7 *p.i.* This suggests that  $LT\beta R^{-/-}$  mice fail to  
141 adequately upregulate (IFN $\gamma$ -dependent) immune responses in the lungs.

142  **$LT\beta R$  deficiency leads to dysregulation of cytokine expression in the lung.** To extent RNAseq data  
143 (Fig. 2a) and cytokine levels in serum (Fig. 1c & Suppl. Fig. 1), we determined mRNA expression levels  
144 of cytokines in the lungs of infected WT and  $LT\beta R^{-/-}$  mice at several time points after infection (Fig. 2b  
145 & 2c). Baseline expression levels of IFN $\gamma$  were higher in  $LT\beta R^{-/-}$  animals, thus, while levels rose on day  
146 4 *p.i.* in both genotypes, this increase was only significant in WT mice (Fig. 2b). While IFN $\gamma$  mRNA  
147 levels were markedly decreased in WT mice by day 10 *p.i.*, they were still markedly but not  
148 significantly elevated in  $LT\beta R^{-/-}$  mice (Fig. 2b). Baseline expression of TNF $\alpha$  was increased in  $LT\beta R^{-/-}$   
149 mice but did not change significantly during the course of infection. WT mice showed a significance  
150 increase in TNF $\alpha$  expression on day 10 *p.i.* (Fig. 2b) indicating a significant difference in the cytokine  
151 response between the two genotypes on day 10 *p.i.* Baseline expression levels of  $LT\beta$  were  
152 significantly increased in  $LT\beta R^{-/-}$  mice, which could be due to a lack of negative feedback or  
153 compensatory mechanisms. However, while levels tended to be higher in  $LT\beta R^{-/-}$  animals throughout  
154 the infection, there were no significant differences in  $LT\beta$  expression between the two genotypes  
155 (Suppl. Fig. 3). IL-4 expression was significantly increased in WT animals on day 10 *p.i.* compared to  
156 baseline expression. In  $LT\beta R^{-/-}$  mice IL-4 expression was comparable to those of WT mice but not

157 significantly increased on day 10 *p.i.* compared to baseline expression (Suppl. Fig. 3). These data  
158 confirm that  $LT\beta R^{-/-}$  mice show a dysregulated immune homeostasis not only in serum (Fig. 1c &  
159 Suppl. Fig.1) but also in lung tissue after *T. gondii* infection.

160 **LT $\beta$ R deficiency leads to impaired IFN $\gamma$ -regulated effector molecule expression in the lung.** IFN $\gamma$ -  
161 regulated effector molecules are pivotal in *T. gondii* elimination (31, 33, 45), having important  
162 immune response functions. In particular, the roles of effector molecules, such as iNOS, IDO, and  
163 NOX2-gp91phox (46-48) are well-documented. Since RNAseq data (Fig. 2a) showed high expression  
164 of effector molecules in infected WT, but not  $LT\beta R^{-/-}$  (31) mice we assessed the expression of major  
165 effector molecules in lungs by qRT-PCR next (Fig. 2c). In contrast to WT mice,  $LT\beta R^{-/-}$  mice failed to up-  
166 regulate iNOS expression post infection leading to significant differences between the two genotypes  
167 on day 7 and 10 *p.i.* WT mice showed significant upregulation of IDO1 expression on day 4 *p.i.* and  
168 had significantly increased IDO1 expression levels on day 10 *p.i.*, whereas  $LT\beta R^{-/-}$  mice showed only a  
169 minor increase of IDO1 expression and this difference was not significant compared to baseline  
170 expression. NOX2-gp91phox presented a similar picture: Significantly increased NOX2-gp91phox  
171 expression in WT animals on day 10 *p.i.* compared to baseline expression as well as compared to  
172  $LT\beta R^{-/-}$  mice and a complete failure of upregulation of NOX2-gp91phox in the absence of LT $\beta$ R. The  
173 failure to adequately upregulate IFN $\gamma$ -regulated effector molecules involved in cell intrinsic defense  
174 mechanisms essential for suppressing *T. gondii* replication most likely contributes to the increased  
175 parasite burden observed in  $LT\beta R^{-/-}$  animals.

176 **LT $\beta$ R deficiency leads to impaired IFN $\gamma$ -induced mGBP expression and IFN $\gamma$  signaling in the lung.**  
177 Another important group of genes upregulated in an IFN $\gamma$ -dependent manner after *T. gondii* infection  
178 are mGBPs (30). These GTPases have been shown to be essentially involved in *T. gondii* elimination  
179 (30-33) . A heat map for mGBP expression data (Fig. 3a) was generated from the RNAseq data  
180 illustrating an overall slight increase in baseline mGBP expression in uninfected (day 0)  $LT\beta R^{-/-}$  mice  
181 compared to WT mice but an overall lower mGBP expression in  $LT\beta R^{-/-}$  compared to WT mice on day  
182 7 *p.i.* These results were confirmed by qRT-PCR analysis of mGBP mRNA expression: For all mGBPs

183 analyzed (mGBP1, 2, 3, 5, 6/10, 7, 8 and 9) we observed a significant increase in mGBP expression  
184 ( $P < 0.0001$  in all cases) in WT animals by day 10 *p.i.* (Fig. 3b). In contrast, in  $LT\beta R^{-/-}$  mice a significant  
185 rise on day 10 *p.i.* compared to baseline expression was only observed for mGBP2, mGBP3 and  
186 mGBP7. Also, expression levels of all mGBPs were significantly higher in WT mice compared to  $LT\beta R^{-/-}$   
187 mice on day 10 *p.i.* with the exception of mGBP6/10 where expression levels were only subtly  
188 increased in WT mice. The failure to adequately upregulate expression of mGBPs early after *T. gondii*  
189 infection was further confirmed by immunoblot analysis, where upregulation of mGBP2 and mGBP7  
190 protein expression was already detectable on day 4 *p.i.* in WT mice but not in  $LT\beta R^{-/-}$  mice (Fig. 3c and  
191 Suppl. Fig. 4). This defect in upregulation of mGBP expression after *T. gondii* infection likely has a  
192 major effect on the ability of  $LT\beta R^{-/-}$  mice to contain parasite replication, as mGBPs are essential for  
193 an effective immune response against this parasite (31-33).

194 Since protein expression of IFN $\gamma$ -induced mGBPs was affected in lungs of  $LT\beta R^{-/-}$  mice in *T. gondii*  
195 infection we further analyzed protein expression of prototype genes directly involved in IFN $\gamma$ R  
196 signaling (Fig. 3c & Suppl. Fig. 4). Protein expression levels of STAT1, pSTAT1, IRF-1, and pSTAT3  
197 increased in WT mice during the course of infection. In contrast,  $LT\beta R^{-/-}$  animals showed a marked  
198 delay in the upregulation of these proteins. In WT animals, JAK1 and STAT3 expression increased  
199 until day 7 *p.i.* but decreased again on day 10 *p.i.* In uninfected  $LT\beta R^{-/-}$  mice, expression of these  
200 proteins was higher than in uninfected WT mice but did not increase early in infection. This also  
201 provides evidence for an altered IFN $\gamma$ /IFN $\gamma$ R signaling axis during *T. gondii* infection.

202 To summarize, mRNA and protein expression data from the lungs indicate that uninfected  $LT\beta R^{-/-}$   
203 animals show an activated immune status compared to WT animals, but fail to adequately  
204 upregulate IFN $\gamma$ -dependent immune effector responses after *T. gondii* infection, possibly explaining  
205 the increased parasite burden and the subsequently increased infection susceptibility of  $LT\beta R^{-/-}$  mice.

206 **mGBP upregulation and recruitment to the PV after IFN $\gamma$  stimulation *in vitro*.** Since upregulation of  
207 mGBP expression was impaired in  $LT\beta R^{-/-}$  mice after *T. gondii* infection (Fig. 3), we asked whether



208 IFN $\gamma$ -dependent upregulation of mGBP expression was directly dependent on LT $\beta$ R signaling (Fig. 4).  
209 We therefore analyzed whether LT $\beta$ R<sup>-/-</sup> mouse embryonic fibroblasts (MEFs) were able to upregulate  
210 mGBPs after IFN $\gamma$  stimulation and whether mGBPs could recruit to the PV in infected, IFN $\gamma$  pre-  
211 treated LT $\beta$ R<sup>-/-</sup> MEFs. After pre-incubation with IFN $\gamma$  *in vitro*, *T. gondii* infected LT $\beta$ R<sup>-/-</sup> and WT MEFs  
212 showed comparable upregulation of all tested mGBPs (mGBP1, 2, 3, 5, 6/10, 7, and 9) with the  
213 exception of mGBP8 where WT mice showed increased mRNA expression (Fig. 4a). Also, after pre-  
214 incubation with IFN $\gamma$  mGBP2 was able to recruit to the PV of *T. gondii* in LT $\beta$ R<sup>-/-</sup> MEFs (Fig. 4b). These  
215 results demonstrate that expression of mGBPs can be successfully induced in LT $\beta$ R<sup>-/-</sup> MEFs in the  
216 presence of exogenous IFN $\gamma$  and that the lack of LT $\beta$ R signaling appears not to interfere with the  
217 ability of mGBP2 to recruit to the PV in LT $\beta$ R<sup>-/-</sup> MEFs. This suggests, that the absence of LT $\beta$ R signals  
218 do not impact IFN $\gamma$ R signaling required for mGBP function.

219 **Differences in spleen size and weight in LT $\beta$ R<sup>-/-</sup> mice.** Since LT $\beta$ R<sup>-/-</sup> mice lack lymph nodes (7), the  
220 spleen is the primary organ where the immune response against *T. gondii* is primed. It has been  
221 described that during the acute phase of *T. gondii* infection the splenic architecture is disrupted  
222 transiently (39). When we compared spleens of WT vs. LT $\beta$ R<sup>-/-</sup> mice, spleens of the latter were  
223 markedly larger (Suppl. Fig. 5a) in uninfected (day 0) healthy animals. While spleens of both  
224 genotypes significantly increased in weight during the course of *T. gondii* infection, spleen weights of  
225 WT mice were significantly higher compared to LT $\beta$ R<sup>-/-</sup> mice on day 10 *p.i.* (Suppl. Fig. 5b). This  
226 increase of spleen weight in WT mice was not due to increased cellularity, as splenocyte counts were  
227 consistently higher in LT $\beta$ R<sup>-/-</sup> spleens before as well as on days 4 and 7 post infection (Suppl. Fig. 5c).  
228 By day 10 *p.i.*, cell numbers in the spleens of both genotypes were comparable, mostly due to a  
229 significant drop of splenocyte numbers in LT $\beta$ R<sup>-/-</sup> mice. This also indicates that the initial immune  
230 response in spleens of LT $\beta$ R<sup>-/-</sup> mice is disturbed.

231 **No apparent difference in T cell subpopulations in spleens of LT $\beta$ R<sup>-/-</sup> mice.** Consecutively, we  
232 analyzed the composition of the splenocytes using flow cytometry (Fig. 5). Since T cells are essential  
233 to control *T. gondii* infection (49, 50), we analyzed T cell subpopulations in LT $\beta$ R<sup>-/-</sup> spleens (Fig. 5a).

234 Analysis of absolute numbers of CD3<sup>+</sup>, CD4<sup>+</sup>, CD8<sup>+</sup>, activated (CD3<sup>+</sup>CD25<sup>+</sup>) T cells and *T. gondii* specific  
235 (pentamer<sup>+</sup>) CD8<sup>+</sup> T cells (Fig. 5a) revealed almost no significant differences between WT and LTβR<sup>-/-</sup>  
236 mice either before or during infection. The only exception were CD4<sup>+</sup> T cells on day 4 *p.i.* where WT  
237 and LTβR<sup>-/-</sup> mice showed a moderate decrease and increase, respectively. In both genotypes,  
238 numbers of activated CD3<sup>+</sup>CD25<sup>+</sup> T cells were significantly increased on day 7 *p.i.* but LTβR<sup>-/-</sup> mice  
239 showed similar numbers of total T cells. In addition, LTβR<sup>-/-</sup> mice showed a comparable rise of  
240 activated CD3<sup>+</sup>CD25<sup>+</sup> T cells on day 7 *p.i.* and a comparable expansion of *T. gondii* specific  
241 (pentamer<sup>+</sup>) CD8<sup>+</sup> T cells on day 10 *p.i.* (Fig. 5a).

242 Baseline numbers of CD19<sup>+</sup> B cells were somewhat higher in LTβR<sup>-/-</sup> mice and significantly increased  
243 on day 4 *p.i.*, but while numbers of CD19<sup>+</sup> B cells dropped significantly in both genotypes on day 10  
244 *p.i.*, they were still significantly higher in LTβR<sup>-/-</sup> mice (Fig. 5b).

245 Since LTβR<sup>-/-</sup> mice are known to have fewer NK and NKT cells (8, 51, 52), it was not surprising to  
246 observe that absolute NK1.1<sup>+</sup> cells were significantly higher in WT compared to LTβR<sup>-/-</sup> mice before  
247 infection and on days 4 and 7 *p.i.* (Fig. 5b). On day 10 *p.i.* NK1.1<sup>+</sup> cell numbers of both genotypes  
248 were similar, due to the drop of NK1.1<sup>+</sup> cells in spleens of WT mice during the course of infection.  
249 Similarly, NK1.1<sup>+</sup>CD3<sup>+</sup> NKT cells in WT mice whose absolute numbers declined during the course of  
250 infection but were higher than those of LTβR<sup>-/-</sup> mice before infection and on days 4 and 7 *p.i.* which is  
251 in accordance with published data (51). Unbiased analysis of the cytometry data set using tSNE (Fig.  
252 5c) confirmed these data, notably the absence of NK1.1<sup>+</sup> cells in uninfected LTβR<sup>-/-</sup> mice (1.46 % and  
253 0.04 %, respectively) and the marked drop in absolute CD19<sup>+</sup> B cell numbers in WT mice by day 10 *p.i.*  
254 which was absent in LTβR<sup>-/-</sup> animals (59.03 % to 2,26 % vs. 71.07 % to 35.39 %, respectively; Fig. 5c).  
255 This demonstrates that the deficiency of the LTβR does not impact T cell numbers after *T. gondii*  
256 infection, especially the expansion of parasite specific T cells, while it does seem to influence B cell  
257 numbers during the acute phase of *T. gondii* infection.

258 In conclusion,  $LT\beta R^{-/-}$  compared to WT mice do not show a significant difference in overall and  
259 antigen specific T cell numbers either before or after *T. gondii* infection, but B cell,  $NK1.1^{+}$  and NKT  
260 cell numbers appear to be significantly affected by the absence of  $LT\beta R$  before and during infection.

261 **Impaired T cell effector function in the spleen in the absence of the  $LT\beta R$ .** Even though  $LT\beta R^{-/-}$  mice  
262 are highly susceptible to *T. gondii* infection we detected comparable  $CD8^{+}$  and *T. gondii* specific  $CD8^{+}$   
263 T cell numbers in the spleen (Fig. 5a). We therefore decided to determine whether these T cells were  
264 fully differentiated and functional with regard to their ability to produce  $IFN\gamma$ , contained cytotoxic  
265 granules ( $GzmB^{+}$  and  $perforin^{+}$ ) and were able to degranulate ( $CD107a^{+}$  cells) upon stimulation. In  
266 order to address this question, splenocytes of infected WT and  $LT\beta R^{-/-}$  mice (day 7 and 10 *p.i.*) were  
267 prepared and were restimulated *ex vivo* with toxoplasma lysate antigen (TLA) before flow cytometry  
268 analysis (Fig. 6).

269 After *ex vivo* TLA restimulation  $LT\beta R^{-/-}$  T cells compared to WT T cells showed a significantly reduced  
270 frequency of  $CD4^{+}$   $IFN\gamma$  producing T cells in splenocytes from day 7 *p.i.* and a reduced percentage in  
271 splenocytes at day 10 *p.i.* Similar frequencies for  $CD8^{+}$   $IFN\gamma$  producing T cells could be detected in  
272 restimulated splenocytes for both genotypes on both days (Fig. 6a). There were no significant  
273 differences between the two genotypes for granzyme B containing  $CD8^{+}$  cells in restimulated cells  
274 from either day 7 or day 10 *p.i.* (Suppl. Fig. 6a). For  $CD8^{+}$  $perforin^{+}$  cells, WT mice showed higher  
275 frequencies in day 10 restimulated cells, but  $LT\beta R^{-/-}$  mice showed a delayed but significant increase  
276 from day 7 to day 10 resulting in frequencies similar to those of WT mice for day 10 *p.i.* (Suppl. Fig.  
277 6a). In contrast,  $CD8^{+}107a^{+}$  T cell frequencies in WT spleens increased significantly in restimulated  
278 cells from day 10 *p.i.* and were significantly higher than that of  $LT\beta R^{-/-}$  spleens (Suppl. Fig. 6a). When  
279 we directly analyzed  $IFN\gamma^{+}GzmB^{+}$  and  $IFN\gamma^{+}perforin^{+}$  cells, we found a significantly higher frequency  
280 in restimulated splenocytes of WT mice at day 7 *p.i.* compared to  $LT\beta R^{-/-}$  mice (Suppl. Fig. 6b).

281 For *T. gondii* specific ( $pentamer^{+}$ )  $CD8^{+}$  T cells (Fig. 6b) we found a significantly higher frequency of  
282  $pentamer^{+}CD8^{+}$   $IFN\gamma$  producing T cells in restimulated splenocytes from WT mice on day 7 *p.i.*

283 compared to  $LT\beta R^{-/-}$  mice but not in restimulated splenocytes from day 10 *p.i.* Interestingly, *T. gondii*  
284 specific  $CD8^{+}GzmB^{+}$  T cells showed a similar picture: A significantly increased frequency in  
285 restimulated splenocytes from WT mice on day 7 *p.i.* as compared to  $LT\beta R^{-/-}$  mice, and no difference  
286 of these cells in splenocytes from day 10 *p.i.* In WT compared to  $LT\beta R^{-/-}$  spleens, *T. gondii* specific  
287  $CD8^{+}perforin^{+}$  T cells were also significantly higher in restimulated WT splenocytes at day 7 *p.i.*  
288 However, here,  $LT\beta R^{-/-}$  mice showed a significantly increased frequency of  $CD8^{+}perforin^{+}$  T cells in  
289 restimulated splenocytes from day 10 compared to day 7 *p.i.* resulting in similar frequencies for WT  
290 and  $LT\beta R^{-/-}$   $CD8^{+}perforin^{+}$  T cells at day 10 *p.i.* Finally, the percentage of *T. gondii* specific  
291  $CD8^{+}CD107a^{+}$  T cells was similar for both genotypes in restimulated splenocytes at day 7 *p.i.*, but  
292 significantly increased for WT mice in restimulated splenocytes from day 10 *p.i.* whereas only few  
293  $CD8^{+}LT\beta R^{-/-}$  T cells degranulated. To summarize, importantly, parasite specific granzyme B granule  
294 containing ( $pentamer^{+}CD8^{+}GzmB^{+}$ ) as well as degranulating ( $pentamer^{+}CD8^{+}CD107a^{+}$ ) T cells do not  
295 appear to be detectable in  $LT\beta R^{-/-}$  mice after *T. gondii* infection, whereas the increase of parasite  
296 specific perforin granule containing ( $pentamer^{+}CD8^{+}perforin^{+}$ ) T cells seems to be delayed in  $LT\beta R^{-/-}$   
297 than WT mice. These results demonstrate that while the T cell compartment does not seem to be  
298 affected in regard to cell numbers  $LT\beta R^{-/-}$  mice show a clear functional defect in the parasite specific  
299  $CD8^{+}$  T cell compartment as well as clearly decreased IFN $\gamma$  producing  $CD4^{+}$  T cells after infection.

300  **$LT\beta R$  deficiency abrogates *T. gondii* specific isotype class switching.** RNAseq data of lung tissue from  
301 uninfected (day 0) and *T. gondii* infected (day 7 *p.i.*) WT and  $LT\beta R^{-/-}$  animals was further analyzed to  
302 elucidate the interaction between *T. gondii* and host immune responses. The data was filtered for  
303 differentially expressed genes, hierarchical clustering was performed and illustrated as sample  
304 dendrogram with a trait heat map (Suppl. Fig. 7a) for identification of possible outliers. All tested  
305 samples showed adequate clustering and could accordingly be grouped into uninfected and infected  
306 WT and  $LT\beta R^{-/-}$  mice. Next, gene expression data was condensed into ten module eigengenes (ME0 -  
307 ME9; Suppl. Fig. 7b) and used to generate a host-pathogen network prediction model (Fig. 7a)  
308 displaying the relationship between modules (ME) and experimental conditions. This model captures

309 the influence of *T. gondii* infection (Infection), the  $LT\beta R^{-/-}$  genotype (Genotype), and total *T. gondii*  
310 genes (X) on host gene modules (ME0 - ME9) detected in each sample. Upon closer inspection, this  
311 model shows that  $LT\beta R$  expression (contained in ME6) is suppressed by the  $LT\beta R^{-/-}$  genotype, which  
312 fits our experimental conditions. This model predicts that in WT mice high expression of genes  
313 contained in ME6 suppresses genes contained in ME4 (Top GO term 'B CELL RECEPTOR SIGNALING  
314 PATHWAY'), while enhancing gene expression in ME3 (Top GO term 'LYMPHOCYTE DIFFERENTIATION'). This  
315 implies that the loss of the  $LT\beta R$  slightly increases ME4 levels (Suppl. Fig. 7c; Top GO term B CELL  
316 RECEPTOR SIGNALING PATHWAY, Fig. 7a) containing genes for IMMUNOGLOBULIN PRODUCTION and HUMORAL  
317 IMMUNE RESPONSE MEDIATED BY CIRCULATING IMMUNOGLOBULIN during *T. gondii* infection. Furthermore, the  
318 network predicts that in  $LT\beta R^{-/-}$  mice *T. gondii* infection reduces ME3 levels (Suppl. Fig. 7d; Top GO  
319 term LYMPHOCYTE DIFFERENTIATION, Fig. 7a) containing genes for B CELL ACTIVATION and ISOTYPE SWITCHING.  
320 In addition, GSEA generated from RNAseq data also showed significant upregulation of these  
321 pathways, indicating a disturbed B cell response (Suppl. Fig. 2).

322 Due to this highly surprising prediction, as well as the different B cell numbers of WT and  $LT\beta R^{-/-}$  in  
323 the spleen on day 10 *p.i.* (Fig. 5a & c), we then asked whether an altered B cell mediated humoral  
324 immune response could be directly involved in the high mortality of  $LT\beta R^{-/-}$  mice after *T. gondii*  
325 infection. The presence of immunoglobulin (Ig) M and IgG antibodies specific for *T. gondii* antigens  
326 was determined during the acute phase of infection (days 4, 7, and 10 *p.i.*) using line blots coated  
327 with specific recombinant *T. gondii* tachyzoite and bradyzoite antigens (ROP1c, GRA7, GRA8, p30 and  
328 MAG1).  $LT\beta R^{-/-}$  mice compared to WT mice showed a delayed and reduced *T. gondii* specific IgM  
329 and, surprisingly, an abrogated *T. gondii* specific IgG antibody response in the serum during infection  
330 (day 4, 7, and 10 *p.i.*; Fig. 7b), demonstrating a lack of functional isotype switching that is in line with  
331 the bioinformatic host-pathogen prediction network.

332  **$LT\beta R$  deficiency can be partially compensated for by transfer of *T. gondii* immune serum.** Since it  
333 has been described that a *T. gondii* specific IgG response is required for a reduction of the parasite  
334 burden (25, 51), we treated  $LT\beta R^{-/-}$  mice with serum from *T. gondii* infected WT animals (immune

335 serum) and uninfected mice (control serum) and monitored survival after *T. gondii* infection (Fig. 7c).  
336 Serum transfer experiments showed that  $LT\beta R^{-/-}$  mice treated with immune serum exhibit  
337 significantly prolonged survival (up to day 14 *p.i.*) compared to littermates that received control  
338 serum which died by day 11 *p.i.*  $IFN\gamma R^{-/-}$  mice served as infection control and succumbed as reported  
339 around day 8 *p.i.* (53). These data demonstrate that  $LT\beta R$  mediated signaling is essential for the  
340 development of an efficient humoral immune response to *T. gondii* infection.

341

## 342 Discussion

343 The results obtained in this study corroborate a profoundly deficient immune response of  $LT\beta R^{-/-}$   
344 mice to *T. gondii* infection and reveal an impaired IFN response, a severe functional T cell defect as  
345 well as a humoral immune deficiency in the absence of  $LT\beta R$ .

346 One reason for the significantly increased parasite burden and significantly reduced survival rates of  
347  $LT\beta R^{-/-}$  mice is the inadequate cytokine, especially the IFN $\gamma$ , response. The elevated levels of  $LT\alpha$  and  
348 significantly increased levels of  $LT\beta$  in the lung of  $LT\beta R^{-/-}$  mice could be caused by compensatory  
349 mechanisms and/or lack of negative feedback mechanisms due to the absence of the  $LT\beta R$ . Since we  
350 also found elevated levels for IFN $\gamma$ , IL-6, IFN $\beta$ , IL1 $\alpha$ , IL-17A, significantly elevated expression levels for  
351 IL-1 $\beta$  in the serum and for IL-4 in the lung, we suggest that overall, uninfected  $LT\beta R^{-/-}$  mice show a  
352 dysregulated, more activated, albeit stable immune homeostasis. This is in accordance with the  
353 finding that  $LT\beta R^{-/-}$  animals present with splenomegaly, most probably due to microbiota-mediated  
354 inflammation (54). When *T. gondii* infection disrupts this precarious balance in  $LT\beta R^{-/-}$  mice the  
355 dysregulation becomes more pronounced: On the one hand,  $LT\beta R^{-/-}$  mice have lower levels of IFN $\gamma$  in  
356 the serum early during infection, but on day 10 *p.i.* when WT mice already show decreased IFN $\gamma$   
357 levels, they remain high in  $LT\beta R^{-/-}$  mice, not only in serum but also in the lungs. Conversely, IL-6  
358 expression in the serum is markedly increased in  $LT\beta R^{-/-}$  mice compared to WT mice throughout the  
359 infection. This suggests that by day 10 *p.i.* parasite expansion is being controlled in WT but not  $LT\beta R^{-/-}$

360 mice. The significantly increased levels of IL-10 in LT $\beta$ R mice on day 10 *p.i.* could be a  
361 protective/counteractive mechanism to prevent extensive immunopathology (55). Interestingly,  
362 several cytokines in LT $\beta$ R<sup>-/-</sup> mice are transiently but significantly upregulated on day 4 *p.i.* This also  
363 suggests a disruption of the precarious immune homeostasis in LT $\beta$ R mice. In contrast to the  
364 activated immune homeostasis in LT $\beta$ R<sup>-/-</sup> mice they show decreased expression levels for  
365 chemokines/chemokine receptors, genes involved in IFN $\gamma$  signaling and IFN $\gamma$  induced genes in the  
366 lung on day 7 *p.i.* This points towards an inability of LT $\beta$ R<sup>-/-</sup> mice to mount an efficient immune  
367 response to *T. gondii* infection and is supported by the finding that upregulation of IFN $\gamma$  regulated  
368 effector molecules known to be important for *T. gondii* containment such as iNOS, IDO1, NOX2-  
369 gp91phox and mGBPs is deficient in LT $\beta$ R animals. In the lung, in the case of NOX2-gp91phox, this  
370 could be due to the lack of TNF $\alpha$  expression, as it has been shown in ex vivo experiments for  
371 Bronchoalveolar Fluid Cells and Human Pulmonary Artery Endothelial Cells that TNF $\alpha$  upregulates  
372 NOX2-gp91phox (56, 57). The mRNA expression profile of mGBPs and protein expression of mGBPs 2  
373 and 7 also fits into this pattern: mGBPs are essential for efficient control of *T. gondii* expansion (31,  
374 33, 58) and RNAseq analysis shows that uninfected LT $\beta$ R mice have overall increased expression of  
375 mGBPs while infected animals show overall less upregulation. And while LT $\beta$ R<sup>-/-</sup> animals do  
376 upregulate mGBP expression during the course of infection, they show significantly lower expression  
377 on day 10 *p.i.* compared to WT mice in all cases except for mGBP6/10.

378 LT $\beta$ R<sup>-/-</sup> animals also show increased baseline expression of IFN $\gamma$  mRNA in the lung, which would  
379 explain the elevated baseline JAK1 protein expression. Increased JAK expression should lead to  
380 increased JAK phosphorylation and consequently increased STAT1 recruitment and STAT1  
381 phosphorylation (59, 60). However, we observed delayed upregulation of STAT1 and less pSTAT1  
382 protein in infected LT $\beta$ R<sup>-/-</sup> animals and therefore hypothesize that the lack of LT $\beta$ R signaling somehow  
383 affects STAT1 expression or recruitment via a so far unknown mechanism. Notably, Kutsch et al. also  
384 showed reduced STAT1 expression in LT $\beta$ R<sup>-/-</sup> mice (61).

385 We conclude that, due to the underlying dysregulation of the immune homeostasis,  $LT\beta R^{-/-}$  mice are  
386 unable to initiate a coordinated immune response leading to either delayed upregulation of essential  
387 cytokines (e.g.  $IFN\gamma$ ) or over-expression of others (e.g. IL-6, TNF). This is also supported by our  
388 findings, that  $LT\beta R^{-/-}$  mice do not show the typical splenomegaly associated with (*T. gondii*) infection  
389 (39).

390 In line with published data, we found a virtual absence of  $NK1.1^{+}$  cells in  $LT\beta R^{-/-}$  mice, and  $NK1.1^{+}$  cell  
391 numbers dropped in WT mice after infection, most probably due to conversion into ILCs (51). Also, a  
392 lack of NKT cells has been shown for  $LT\beta R^{-/-}$  mice (62). Interestingly, a dual role for NKT cells in *T.*  
393 *gondii* infection has been described: On the one hand, they are able to release large amounts of IL-4  
394 and  $IFN\gamma$  upon activation and to shift the T cell response towards a Th1 pattern, and on the other  
395 hand, the uncontrolled Th1 response can lead to severe immunopathology (63). Since they have also  
396 been indicated in the suppression of a protective immunity against *T. gondii* infection (64) it is maybe  
397 not surprising that their numbers are downregulated after infection in WT animals.

398 Overall, we did not find T cell numbers to be significantly different in either uninfected or *T. gondii*  
399 infected  $LT\beta R^{-/-}$  mice compared to WT mice. However, we found profound defects in T cell effector  
400 functions: The reduced number of  $IFN\gamma$  producing  $CD4^{+}$  T cells and functional *T. gondii* specific  $CD8^{+}$   
401 cytotoxic lymphocytes ( $GzmB^{+}$ , perforin+,  $CD107a^{+}$ ) strongly implies that cytotoxic T cell mediated  
402 killing is severely impaired in  $LT\beta R^{-/-}$  animals. Since these responses are known to be essential for  
403 efficient *T. gondii* containment, this marked functional deficiency is probably one reason for the  
404 susceptibility of  $LT\beta R^{-/-}$  mice to the parasite.

405 In contrast to T cell numbers, B cell numbers differed significantly in  $LT\beta R^{-/-}$  mice compared to WT  
406 mice. On day 10 post infection, numbers of  $CD19^{+}$  B cells in WT spleens were significantly lower  
407 compared to those of  $LT\beta R^{-/-}$  animals. This is most probably due to maturation of B cells to IgG  
408 producing plasma cells in WT mice, which emigrate to the bone marrow and lose surface CD19 in the



409 process. In  $LT\beta R^{-/-}$  mice the lack of class switching would inhibit maturation and migration of B cells to  
410 the bone marrow.

411 Since the host-pathogen network prediction model we generated from *T. gondii* infected mice  
412 indicated that the loss of the  $LT\beta R$  inhibits B cell responses including isotype switching in *T. gondii*  
413 infection we further analyzed the humoral immune response. We were able demonstrate that *T.*  
414 *gondii* infected  $LT\beta R^{-/-}$  mice produced less *T. gondii* specific IgM compared to WT mice, and no  
415 detectable *T. gondii* specific IgG. In as much this failure is due to impaired IFN $\gamma$  production which is an  
416 important cytokine for isotype class switching (65) will be determined in the future.

417 While Glatman Zaretzky et al. (39) argue that the disrupted lymphoid structure, which includes the  
418 lack of defined germinal centers in  $LT\beta R^{-/-}$  mice is the main cause of the reduced antibody response,  
419 Ehlers et al. (5) show via BM chimeras that the effects of  $LT\beta R$  deficiency in *M. tuberculosis* infection  
420 cannot be attributed solely to the architectural differences, but are also directly caused by the lack of  
421  $LT\beta R$  mediated signaling.  $LT\alpha$ , another member of the TNF/TNFR superfamily, has similar but not  
422 identical functions to  $LT\beta$  in the development of secondary lymphoid organs and immune modulation  
423 (2).  $LT\alpha^{-/-}$  animals also present with a disturbed architecture of the lymphoid system (no LNs, no  
424 PPs, no GCs and a disorganized white pulp) (2, 66). *T. gondii* infected  $LT\alpha^{-/-}$  mice are shown to have  
425 reduced numbers of *T. gondii* specific IFN $\gamma$  producing T cells and lower *T. gondii* specific antibody  
426 titers but BM chimera experiments demonstrated that an intact secondary lymphoid system is not  
427 sufficient to generate an effective immune response (25).

428 Although protective B cell responses have been described to play a more significant role in chronic  
429 rather than acute *T. gondii* infection in some *T. gondii* infection models (49-51, 67) our data indicate  
430 that a robust humoral immune response is dependent on  $LT\beta R$  signaling and also is a prerequisite for  
431 survival during acute *T. gondii* infection. This conclusion is validated by our data showing that the  
432 survival of  $LT\beta R^{-/-}$  animals can be significantly prolonged by transfer of immune serum containing  
433 *T. gondii* specific antibodies.

434 Finally, the host-pathogen prediction network generated in this study indicates that *T. gondii*  
435 infection suppresses B cell responses in WT animals. This could point towards an unknown *T. gondii*  
436 strategy to evade the host immune system. Early *T. gondii* mediated suppression of B cell responses  
437 could support dissemination and cyst formation in the brain, facilitating the establishment of chronic  
438 infection (25, 68). Since *T. gondii* is known to have developed different mechanisms to evade host  
439 immune responses (69), it is worth exploring this approach in the future.

440 Taken together, we demonstrate that the loss of LT $\beta$ R signaling results in a combined and profoundly  
441 depressed IFN $\gamma$  response, impaired T cell functionality and the failure to induce parasite specific IgG  
442 antibodies leading to an increase in parasite burden and fatal outcome of *T. gondii* infection.  
443 Therefore, for the first time, we suggest an LT $\beta$ R mediated modulation of the IFN $\gamma$  signaling pathway  
444 *in vivo*. Further understanding of this complex interplay between LT $\beta$ R and IFN $\gamma$  signaling pathways  
445 will provide new insights into the pathogenesis of *T. gondii* and may provide novel therapeutic  
446 strategies.

447

#### 448 **Acknowledgments**

449 We thank Nicole Küpper, Julia Mock and Karin Buchholz for technical assistance. This work was  
450 supported by the Jürgen Manchot Foundation (Molecules of Infection III – MOI III). Computational  
451 support of the Zentrum für Informations- und Medientechnologie, especially the HPC team (High  
452 Performance Computing) at the Heinrich Heine University is acknowledged.

453

#### 454 **Author contributions**

455 A.T. performed and analyzed all experiments, except for Fig. 2a, Fig. 3a, Fig. 4, Fig. 7a, supplementary  
456 Fig. 2 and Fig. 7; RVS developed the immune network models for analysis of RNAseq datasets. M.H.  
457 performed experiments illustrated in Fig. 4. P.P. and K.K. performed RNA sequencing. A.T., U.R.S. and

458 K.P. wrote the manuscript with input from D.D., I.R.D. and C.F.W; K.P., U.R.S. and A.T. designed the  
459 study.

460

#### 461 **Competing interests**

462 The authors declare no competing interests.

463

#### 464 **Additional information**

465 Supplementary information is available for this paper.

466

#### 467 **Methods**

468 **Mice.**  $LT\beta R^{-/-}$  mice were previously described (7) and are back crossed for at least 10 generations  
469 onto a C57BL/6N background. Wild-type (WT) littermates were used as controls. Mice were kept  
470 under specific pathogen-free conditions (SPF) in the animal facility at the Heinrich Heine University  
471 Düsseldorf and were 8-16 weeks old for experiments. Cysts of the ME49 strain (substrain 2017) of  
472 *T. gondii* were collected from the brain tissue of chronically infected CD1 mice. All animal  
473 experiments were conducted in strict accordance with the German Animal Welfare Act. The  
474 protocols were approved by the local authorities (Permit# 84-02.04.2013.A495, 81-02.04.2018.A406  
475 and 81-02.05.40.18.082). All applicable international, national, and institutional guidelines for the  
476 care and  
477 use of animals were followed.

478 ***Toxoplasma gondii* infection experiments.** Mice were intraperitoneally infected with 40 cysts (ME49  
479 strain) and weighed and scored daily for the duration of the experiments. Mice were euthanized on  
480 days 4, 7 and 10 post infection (*d.p.i.*), uninfected mice (d0) served as controls. After euthanasia  
481 (100 mg/kg Ketamin, 10 mg/kg Xylazin, Vétoquinol GmbH) blood was taken from the Vena cava  
482 inferior and spleen, lung and muscle tissue was harvested for analysis.

483 **Detection of parasite load.** Total DNA was isolated from tissues using a DNA isolation kit (Genekam)  
484 according to the manufacturer's protocol. qRT-PCR was performed on a Bio-Rad CFX-96 Touch-Real-  
485 Time Detection System. TgB1 primers and probe (Metabion) were used to amplify a defined section  
486 of the 35-fold repetitive B1 gene from *T. gondii* and are listed in Supplementary Table 1. The *T. gondii*  
487 standard curve was used to determine B1 amplification for calculation of parasite load.

488 **Cytokine measurement.** Cytokines CCL2, IFN $\gamma$ , IFN $\beta$ , IL-1 $\alpha$ , IL-1 $\beta$ , IL-6, IL-10, IL12p70, IL-17A, IL-23, IL-  
489 27, and TNF $\alpha$  were measured using the LEGENDplex™ Mouse Inflammation Panel (BioLegend®)  
490 according to the manufacturer's protocol. Samples were measured using a BD FACSCanto™ II.

491 **Real-time qRT-PCR.** Total RNA was isolated from tissues using the TRIzol reagent (Invitrogen)  
492 according to the manufacturer's protocol. cDNA was reversely transcribed using SuperScript III  
493 reverse transcriptase (200 U/ $\mu$ l; Invitrogen). qRT-PCR was performed on the Bio-Rad CFX-96 Touch-  
494 Real-Time Detection System. Primer sequences and corresponding probes (Metabion, Roche &  
495 TipMolBIOL) are listed in Supplementary Table 1. Results are expressed relative to expression in  
496 untreated WT mice normalized to  $\beta$ -actin ( $2^{-\Delta\Delta CT}$ ).

497 **RNAseq analysis.** Lung tissue of uninfected (d0) und *T. gondii* infected (ME49 strain, 40 cysts, *i.p.*) WT  
498 and LT $\beta$ R $^{-/-}$  mice was obtained and RNA sequencing was performed on a HiSeq3000 device. Mouse  
499 and *T. gondii* transcripts were quantified from fastq files using Salmon with default settings and  
500 GCbias compensation. For transcriptome models, *Mus musculus* GRCm38 cDNA (ensembl.org,  
501 release-97) and *Tgondii*ME49 Annotated Transcripts (toxodb.org, ToxoDB-45) were used. Mouse  
502 transcripts from pseudogenes or with retained introns were excluded prior to conversion to gene  
503 counts by the DESeq2 package. Non-protein encoding *T. gondii* transcripts were excluded prior to  
504 conversion to gene counts. DESeq2 was used to test for Genotype-specific responsiveness to  
505 infection with the following model:  $\sim$  Genotype \* Infection. To calculate WT-specific responsiveness,  
506 we used the following model:  $\sim$  Genotype + Genotype: Infection. For significance the Wald test with  
507 an adjusted p-value of 0.1 was used.

508 **Host-pathogen network generation.** Previously developed analytic tools for ‘omics datasets were  
509 used to generate the host-pathogen network as described (70). Prior to network generation, the VST-  
510 normalized data were filtered for genes that showed significant differential expression for at least  
511 one contrast. This produced an expression matrix for 10,748 genes. The GmicR package was then  
512 used for module detection, using a minimum module size of 30, mergeCutHeight of 0.3, and  
513 Rsquared cut of 0.80. To detect relationships between modules and infection, VST-normalized data  
514 *T. gondii* expression levels for each sample were aggregated by sum and then this numeric data was  
515 merged to module eigengenes using the Data\_Prep function of GmicR [Supplementary Figure 6].  
516 Genotype and infection conditions were merged with the discretized data. A white list indicating the  
517 parent to child relationship from “Genotype” to “ME6” corresponding to the module containing LTβR  
518 was included in the Bayesian network learning process. A final network was generated using the  
519 bn\_tabu\_gen function with 500 bootstrap replicates, “bds” score, and iss set to 1. Inverse  
520 relationships between nodes were detected using the InverseARCs function from GmicR with default  
521 settings.

522 **Immunoblot analysis and antibodies.** Tissues were homogenized in PBS containing cComplete™  
523 Protease Inhibitor Cocktail (Roche) using the Precellys® homogenizer (Bertin). Protein concentration  
524 was measured using the Pierce BCA Protein Assay Kit (Thermo Scientific™) according to the  
525 manufacturer’s protocol. Samples [10 µg/lane] were separated by 4-12% SDS-PAGE, followed by  
526 electrophoretic transfer to nitrocellulose membranes before blocking and incubation with primary  
527 antibodies listed in Supplementary Table 2. HRP-labeled anti-rabbit or anti-mouse antibodies (Cell  
528 Signaling Technologies) were used as secondary antibodies. Relative signal intensity of protein bands  
529 was quantified using ImageJ (NIH).

530 **tSNE.** The cloud-based platform Cytobank® (71) (Mountain View) was used for visualization of flow  
531 cytometry data. 60,000 events per sample were analyzed (parameters: iterations 2,400, perplexity  
532 80, Theta 0.5) before overlaid dot plots were generated.

533 **Flow cytometry.** Spleens were harvested and digested 30 min. at 37 °C using Collagenase D (100  
534 mg/ml) and DNase I (20,000 U/ml). Tissue digest was stopped using 1x PBS containing 10 mM EDTA  
535 before cell solution was filtered using a 70 µm cell strainer. A RBC lysis (Merck) was performed  
536 before cell numbers were calculated. Single-cell suspended splenocytes ( $1 \times 10^6$  cells) were stained  
537 with the Fixable Viability Dye eFluor® 780 (eBioscience™). Surface staining with antibodies specific  
538 for CD3e (145-2c11), CD4 (RM4-5), CD8a (53-6.7), CD19 (6D5), CD25 (3C7), and NK1.1 (PK136) all  
539 purchased from BioLegend (except for CD4 purchased from BD Bioscience), was performed. For  
540 intracellular staining splenocytes were incubated for 20 h with toxoplasma lysate antigen (TLA, 15  
541 µg/ml) before adding brefeldin A (eBioscience™) for an additional 4 hours. After surface staining  
542 with anti-CD4 (RM4-5), anti-CD8a (53-6.7), anti-CD107a (1D4B), and anti-TCRb (H57-597) cells were  
543 fixed, permeabilized and stained with anti-IFN $\gamma$  (XMG1.2), anti-granzyme B (QA16A02), and anti-  
544 perforin (S16009A) (all purchased from BioLegend) using Fix & Perm® Cell Permeabilization Kit (Life  
545 Technologies) according to the manufacturer's protocol. Major histocompatibility complex class I -  
546 SVLAFRRL pentamer was purchased from ProImmune and used in experiments as indicated. BD  
547 Calibrate beads (BD Bioscience) were added to the samples before acquisition with a BD LSRFortessa.

548 **Detection of *T. gondii* specific antibodies.** *RecomLine Toxoplasma* IgG/IgM kit (Mikrogen Diagnostik)  
549 was used to detect IgM and IgG antibodies against *T. gondii* in serum. Anti-human IgM and IgG  
550 conjugates provided within the kit were replaced with anti-mouse IgM-HRP-labeled (Invitrogen) and  
551 anti-mouse IgG-HRP-labeled (Invitrogen) conjugates. Otherwise, the assay was performed according  
552 to the manufacturer's protocol.

553 **Serum transfer.** Blood from naïve donor mice (control serum) or WT mice infected with 20 cysts *i.p.*  
554 of the ME49 strain of *T. gondii* (immune serum) was collected from the vena cava inferior. After 2h  
555 incubation at RT serum was collected by centrifugation of the blood. Acceptor WT and LT $\beta$ R $^{-/-}$  mice  
556 were reconstituted intraperitoneally with 0.2 ml serum one day prior to infection (d-1) as well as on  
557 days 3, 7 and 11 *p.i.* Acceptor (WT and LT $\beta$ R $^{-/-}$  mice) as well as IFN $\gamma$  $^{-/-}$  control mice were  
558 intraperitoneally infected with 10 cysts (ME49 strain) and weighed and scored daily for the duration

559 of the experiment. *T. gondii* specific antibodies were detected via Line Blots to confirm the presence  
560 and assess the amount of *T. gondii* specific antibodies in control and immune serum.

561 **Statistical analysis.** Data were analyzed with Prism (Version8, GraphPad) using log rank (Mantel Cox)  
562 test or 2way ANOVA corrected for multiple comparison by the Tukey's or Sidak's post hoc test as  
563 indicated in the figure legends. Symbols represent individual animals, columns represent mean  
564 values and error bars represent  $\pm$  SEM. P values of  $\leq 0.0332$  were considered statistically significant  
565 and marked with asterisks. P values of  $\geq 0.0332$  were considered statistically not significant and were  
566 not specifically marked.

567 **Data availability.** The data that support the findings of this study are available from the  
568 corresponding author.

569

## 570 **References**

- 571 1. Ward-Kavanagh LK, Lin WW, Sedy JR, Ware CF. 2016. The TNF Receptor Superfamily in Co-  
572 stimulating and Co-inhibitory Responses. *Immunity* 44:1005-19.
- 573 2. Hehlgans T, Pfeffer K. 2005. The intriguing biology of the tumour necrosis factor/tumour  
574 necrosis factor receptor superfamily: players, rules and the games. *Immunology* 115:1-20.
- 575 3. Schneider K, Potter KG, Ware CF. 2004. Lymphotoxin and LIGHT signaling pathways and  
576 target genes. *Immunol Rev* 202:49-66.
- 577 4. Ware CF. 2005. Network communications: lymphotoxins, LIGHT, and TNF. *Annu Rev Immunol*  
578 23:787-819.
- 579 5. Ehlers S, Holscher C, Scheu S, Tertilt C, Hehlgans T, Suwinski J, Endres R, Pfeffer K. 2003. The  
580 lymphotoxin beta receptor is critically involved in controlling infections with the intracellular  
581 pathogens *Mycobacterium tuberculosis* and *Listeria monocytogenes*. *Journal of immunology*  
582 170:5210-8.
- 583 6. Spahn TW, Maaser C, Eckmann L, Heidemann J, Lugering A, Newberry R, Domschke W,  
584 Herbst H, Kucharzik T. 2004. The lymphotoxin-beta receptor is critical for control of murine  
585 *Citrobacter rodentium*-induced colitis. *Gastroenterology* 127:1463-73.
- 586 7. Fütterer A, Mink K, Luz A, Kosco-Vilbois MH, Pfeffer K. 1998. The lymphotoxin beta receptor  
587 controls organogenesis and affinity maturation in peripheral lymphoid tissues. *Immunity*  
588 9:59-70.
- 589 8. Wu Q, Sun Y, Wang J, Lin X, Wang Y, Pegg LE, Fütterer A, Pfeffer K, Fu YX. 2001. Signal via  
590 lymphotoxin-beta R on bone marrow stromal cells is required for an early checkpoint of NK  
591 cell development. *J Immunol* 166:1684-9.
- 592 9. Banks TA, Rickert S, Ware CF. 2006. Restoring immune defenses via lymphotoxin signaling:  
593 lessons from cytomegalovirus. *Immunol Res* 34:243-54.



- 594 10. Puglielli MT, Browning JL, Brewer AW, Schreiber RD, Shieh WJ, Altman JD, Oldstone MB, Zaki  
595 SR, Ahmed R. 1999. Reversal of virus-induced systemic shock and respiratory failure by  
596 blockade of the lymphotoxin pathway. *Nat Med* 5:1370-4.
- 597 11. Jin L, Guo X, Shen C, Hao X, Sun P, Li P, Xu T, Hu C, Rose O, Zhou H, Yang M, Qin CF, Guo J,  
598 Peng H, Zhu M, Cheng G, Qi X, Lai R. 2018. Salivary factor LTRIN from *Aedes aegypti* facilitates  
599 the transmission of Zika virus by interfering with the lymphotoxin-beta receptor. *Nat*  
600 *Immunol* 19:342-353.
- 601 12. Behnke K, Sorg UR, Gabbert HE, Pfeffer K. 2017. The Lymphotoxin beta Receptor Is Essential  
602 for Upregulation of IFN-Induced Guanylate-Binding Proteins and Survival after *Toxoplasma*  
603 *gondii* Infection. *Mediators Inflamm* 2017:7375818.
- 604 13. Hill DE, Chirukandoth S, Dubey JP. 2005. Biology and epidemiology of *Toxoplasma gondii* in  
605 man and animals. *Anim Health Res Rev* 6:41-61.
- 606 14. Saadatnia G, Golkar M. 2012. A review on human toxoplasmosis. *Scand J Infect Dis* 44:805-  
607 14.
- 608 15. Montoya JG, Liesenfeld O. 2004. Toxoplasmosis. *Lancet* 363:1965-76.
- 609 16. Hakimi MA, Olias P, Sibley LD. 2017. *Toxoplasma* Effectors Targeting Host Signaling and  
610 Transcription. *Clin Microbiol Rev* 30:615-645.
- 611 17. Petersen E. 2007. Toxoplasmosis. *Semin Fetal Neonatal Med* 12:214-23.
- 612 18. Gaddi PJ, Yap GS. 2007. Cytokine regulation of immunopathology in toxoplasmosis. *Immunol*  
613 *Cell Biol* 85:155-9.
- 614 19. Denkers EY. 1999. T lymphocyte-dependent effector mechanisms of immunity to *Toxoplasma*  
615 *gondii*. *Microbes Infect* 1:699-708.
- 616 20. Ivanova DL, Denton SL, Fettel KD, Sondgeroth KS, Munoz Gutierrez J, Bangoura B, Dunay IR,  
617 Gigley JP. 2019. Innate Lymphoid Cells in Protection, Pathology, and Adaptive Immunity  
618 During Apicomplexan Infection. *Front Immunol* 10:196.
- 619 21. Darwich L, Coma G, Pena R, Bellido R, Blanco EJ, Este JA, Borrás FE, Clotet B, Ruiz L, Rosell A,  
620 Andreo F, Parkhouse RM, Bofill M. 2009. Secretion of interferon-gamma by human  
621 macrophages demonstrated at the single-cell level after costimulation with interleukin (IL)-12  
622 plus IL-18. *Immunology* 126:386-93.
- 623 22. Suzuki Y, Orellana MA, Schreiber RD, Remington JS. 1988. Interferon-gamma: the major  
624 mediator of resistance against *Toxoplasma gondii*. *Science* 240:516-8.
- 625 23. Yap GS, Sher A. 1999. Cell-mediated immunity to *Toxoplasma gondii*: initiation, regulation  
626 and effector function. *Immunobiology* 201:240-7.
- 627 24. Saeij JP, Frickel EM. 2017. Exposing *Toxoplasma gondii* hiding inside the vacuole: a role for  
628 GBPs, autophagy and host cell death. *Curr Opin Microbiol* 40:72-80.
- 629 25. Schluter D, Kwok LY, Lutjen S, Soltek S, Hoffmann S, Korner H, Deckert M. 2003. Both  
630 lymphotoxin-alpha and TNF are crucial for control of *Toxoplasma gondii* in the central  
631 nervous system. *Journal of immunology* 170:6172-82.
- 632 26. Daubener W, Remscheid C, Nockemann S, Pilz K, Seghrouchni S, Mackenzie C, Hadding U.  
633 1996. Anti-parasitic effector mechanisms in human brain tumor cells: role of interferon-  
634 gamma and tumor necrosis factor-alpha. *Eur J Immunol* 26:487-92.
- 635 27. Fox BA, Gigley JP, Bzik DJ. 2004. *Toxoplasma gondii* lacks the enzymes required for de novo  
636 arginine biosynthesis and arginine starvation triggers cyst formation. *Int J Parasitol* 34:323-  
637 31.
- 638 28. Pfefferkorn ER, Rebhun S, Eckel M. 1986. Characterization of an indoleamine 2,3-dioxygenase  
639 induced by gamma-interferon in cultured human fibroblasts. *J Interferon Res* 6:267-79.
- 640 29. Scharon-Kersten TM, Yap G, Magram J, Sher A. 1997. Inducible nitric oxide is essential for  
641 host control of persistent but not acute infection with the intracellular pathogen *Toxoplasma*  
642 *gondii*. *J Exp Med* 185:1261-73.
- 643 30. Degrandi D, Konermann C, Beuter-Gunia C, Kresse A, Wurthner J, Kurig S, Beer S, Pfeffer K.  
644 2007. Extensive characterization of IFN-induced GTPases mGBP1 to mGBP10 involved in host  
645 defense. *J Immunol* 179:7729-40.



- 646 31. Steffens N, Beuter-Gunia C, Kravets E, Reich A, Legewie L, Pfeffer K, Degrandi D. 2020.  
647 Essential Role of mGBP7 for Survival of *Toxoplasma gondii* Infection. *mBio* 11.  
648 32. Yamamoto M, Okuyama M, Ma JS, Kimura T, Kamiyama N, Saiga H, Ohshima J, Sasai M,  
649 Kayama H, Okamoto T, Huang DC, Soldati-Favre D, Horie K, Takeda J, Takeda K. 2012. A  
650 cluster of interferon-gamma-inducible p65 GTPases plays a critical role in host defense  
651 against *Toxoplasma gondii*. *Immunity* 37:302-13.  
652 33. Degrandi D, Kravets E, Konermann C, Beuter-Gunia C, Klumpers V, Lahme S, Wischmann E,  
653 Mausberg AK, Beer-Hammer S, Pfeffer K. 2013. Murine guanylate binding protein 2 (mGBP2)  
654 controls *Toxoplasma gondii* replication. *Proc Natl Acad Sci U S A* 110:294-9.  
655 34. Clough B, Frickel EM. 2017. The *Toxoplasma* Parasitophorous Vacuole: An Evolving Host-  
656 Parasite Frontier. *Trends Parasitol* 33:473-488.  
657 35. Selleck EM, Fentress SJ, Beatty WL, Degrandi D, Pfeffer K, Virgin HWt, Macmicking JD, Sibley  
658 LD. 2013. Guanylate-binding protein 1 (Gbp1) contributes to cell-autonomous immunity  
659 against *Toxoplasma gondii*. *PLoS Pathog* 9:e1003320.  
660 36. Kravets E, Degrandi D, Ma Q, Peulen TO, Klumpers V, Felekyan S, Kuhnemuth R, Weidtkamp-  
661 Peters S, Seidel CA, Pfeffer K. 2016. Guanylate binding proteins directly attack *Toxoplasma*  
662 *gondii* via supramolecular complexes. *Elife* 5.  
663 37. Yap GS, Scharton-Kersten T, Charest H, Sher A. 1998. Decreased resistance of TNF receptor  
664 p55- and p75-deficient mice to chronic toxoplasmosis despite normal activation of inducible  
665 nitric oxide synthase in vivo. *Journal of immunology* 160:1340-5.  
666 38. Deckert-Schluter M, Bluethmann H, Rang A, Hof H, Schluter D. 1998. Crucial role of TNF  
667 receptor type 1 (p55), but not of TNF receptor type 2 (p75), in murine toxoplasmosis. *Journal*  
668 *of immunology* 160:3427-36.  
669 39. Glatman Zaretsky A, Silver JS, Siwicki M, Durham A, Ware CF, Hunter CA. 2012. Infection with  
670 *Toxoplasma gondii* alters lymphotoxin expression associated with changes in splenic  
671 architecture. *Infection and immunity* doi:10.1128/IAI.00333-12.  
672 40. Gazzinelli RT, Eltoun I, Wynn TA, Sher A. 1993. Acute cerebral toxoplasmosis is induced by in  
673 vivo neutralization of TNF-alpha and correlates with the down-regulated expression of  
674 inducible nitric oxide synthase and other markers of macrophage activation. *J Immunol*  
675 151:3672-81.  
676 41. Schaper F, Rose-John S. 2015. Interleukin-6: Biology, signaling and strategies of blockade.  
677 *Cytokine Growth Factor Rev* 26:475-87.  
678 42. Saraiva M, O'Garra A. 2010. The regulation of IL-10 production by immune cells. *Nat Rev*  
679 *Immunol* 10:170-81.  
680 43. Brenier-Pinchart MP, Villena I, Mercier C, Durand F, Simon J, Cesbron-Delauw MF, Pelloux H.  
681 2006. The *Toxoplasma* surface protein SAG1 triggers efficient in vitro secretion of chemokine  
682 ligand 2 (CCL2) from human fibroblasts. *Microbes Infect* 8:254-61.  
683 44. Singhanian A, Graham CM, Gabrysova L, Moreira-Teixeira L, Stavropoulos E, Pitt JM,  
684 Chakravarty P, Warnatsch A, Branchett WJ, Conejero L, Lin JW, Davidson S, Wilson MS,  
685 Bancroft G, Langhorne J, Frickel E, Sesay AK, Priestnall SL, Herbert E, Ioannou M, Wang Q,  
686 Humphreys IR, Dodd J, Openshaw PJM, Mayer-Barber KD, Jankovic D, Sher A, Lloyd CM,  
687 Baldwin N, Chaussabel D, Papayannopoulos V, Wack A, Banchereau JF, Pascual VM, O'Garra  
688 A. 2019. Transcriptional profiling unveils type I and II interferon networks in blood and  
689 tissues across diseases. *Nat Commun* 10:2887.  
690 45. Yarovinsky F. 2014. Innate immunity to *Toxoplasma gondii* infection. *Nat Rev Immunol*  
691 14:109-21.  
692 46. Ratna A, Arora SK. 2016. Leishmania recombinant antigen modulates macrophage effector  
693 function facilitating early clearance of intracellular parasites. *Trans R Soc Trop Med Hyg*  
694 110:610-619.  
695 47. Koo SJ, Chowdhury IH, Szczesny B, Wan X, Garg NJ. 2016. Macrophages Promote Oxidative  
696 Metabolism To Drive Nitric Oxide Generation in Response to *Trypanosoma cruzi*. *Infect*  
697 *Immun* 84:3527-3541.

- 698 48. Ufermann CM, Domrose A, Babel T, Tersteegen A, Cengiz SC, Eller SK, Spekker-Bosker K, Sorg  
699 UR, Forster I, Daubener W. 2019. Indoleamine 2,3-Dioxygenase Activity During Acute  
700 Toxoplasmosis and the Suppressed T Cell Proliferation in Mice. *Front Cell Infect Microbiol*  
701 9:184.
- 702 49. Pittman KJ, Knoll LJ. 2015. Long-Term Relationships: the Complicated Interplay between the  
703 Host and the Developmental Stages of *Toxoplasma gondii* during Acute and Chronic  
704 Infections. *Microbiol Mol Biol Rev* 79:387-401.
- 705 50. Sher A, Denkers EY, Gazzinelli RT. 1995. Induction and regulation of host cell-mediated  
706 immunity by *Toxoplasma gondii*. *Ciba Found Symp* 195:95-104; discussion 104-9.
- 707 51. Park E, Patel S, Wang Q, Andhey P, Zaitsev K, Porter S, Hershey M, Bern M, Plougastel-  
708 Douglas B, Collins P, Colonna M, Murphy KM, Oltz E, Artyomov M, Sibley LD, Yokoyama WM.  
709 2019. *Toxoplasma gondii* infection drives conversion of NK cells into ILC1-like cells. *Elife* 8.
- 710 52. Vallabhapurapu S, Powolny-Budnicka I, Riemann M, Schmid RM, Paxian S, Pfeffer K, Korner  
711 H, Weih F. 2008. Rel/NF-kappaB family member RelA regulates NK1.1- to NK1.1+ transition as  
712 well as IL-15-induced expansion of NKT cells. *Eur J Immunol* 38:3508-19.
- 713 53. Deckert-Schluter M, Rang A, Weiner D, Huang S, Wiestler OD, Hof H, Schluter D. 1996.  
714 Interferon-gamma receptor-deficiency renders mice highly susceptible to toxoplasmosis by  
715 decreased macrophage activation. *Laboratory investigation; a journal of technical methods*  
716 *and pathology* 75:827-41.
- 717 54. Zhang Y, Kim TJ, Wroblewska JA, Tesic V, Upadhyay V, Weichselbaum RR, Tumanov AV, Tang  
718 H, Guo X, Tang H, Fu YX. 2018. Type 3 innate lymphoid cell-derived lymphotoxin prevents  
719 microbiota-dependent inflammation. *Cell Mol Immunol* 15:697-709.
- 720 55. Gazzinelli RT, Wysocka M, Hieny S, Schariton-Kersten T, Cheever A, Kuhn R, Muller W,  
721 Trinchieri G, Sher A. 1996. In the absence of endogenous IL-10, mice acutely infected with  
722 *Toxoplasma gondii* succumb to a lethal immune response dependent on CD4+ T cells and  
723 accompanied by overproduction of IL-12, IFN-gamma and TNF-alpha. *J Immunol* 157:798-  
724 805.
- 725 56. Frey RS, Rahman A, Kefer JC, Minshall RD, Malik AB. 2002. PKCzeta regulates TNF-alpha-  
726 induced activation of NADPH oxidase in endothelial cells. *Circ Res* 90:1012-9.
- 727 57. Ziltener P, Reinheckel T, Oxenius A. 2016. Neutrophil and Alveolar Macrophage-Mediated  
728 Innate Immune Control of *Legionella pneumophila* Lung Infection via TNF and ROS. *PLoS*  
729 *Pathog* 12:e1005591.
- 730 58. Ohshima J, Lee Y, Sasai M, Saitoh T, Su Ma J, Kamiyama N, Matsuura Y, Pann-Ghill S, Hayashi  
731 M, Ebisu S, Takeda K, Akira S, Yamamoto M. 2014. Role of mouse and human autophagy  
732 proteins in IFN-gamma-induced cell-autonomous responses against *Toxoplasma gondii*. *J*  
733 *Immunol* 192:3328-35.
- 734 59. Kisseleva T, Bhattacharya S, Braunstein J, Schindler CW. 2002. Signaling through the  
735 JAK/STAT pathway, recent advances and future challenges. *Gene* 285:1-24.
- 736 60. Greenlund AC, Farrar MA, Viviano BL, Schreiber RD. 1994. Ligand-induced IFN gamma  
737 receptor tyrosine phosphorylation couples the receptor to its signal transduction system  
738 (p91). *EMBO J* 13:1591-600.
- 739 61. Kutsch S, Degrandi D, Pfeffer K. 2008. Immediate lymphotoxin beta receptor-mediated  
740 transcriptional response in host defense against *L. monocytogenes*. *Immunobiology* 213:353-  
741 66.
- 742 62. Franki AS, Van Beneden K, Dewint P, Hammond KJ, Lambrecht S, Leclercq G, Kronenberg M,  
743 Deforce D, Elewaut D. 2006. A unique lymphotoxin {alpha}beta-dependent pathway  
744 regulates thymic emigration of V{alpha}14 invariant natural killer T cells. *Proc Natl Acad Sci U*  
745 *S A* 103:9160-5.
- 746 63. Ronet C, Darche S, Leite de Moraes M, Miyake S, Yamamura T, Louis JA, Kasper LH, Buzoni-  
747 Gatel D. 2005. NKT cells are critical for the initiation of an inflammatory bowel response  
748 against *Toxoplasma gondii*. *J Immunol* 175:899-908.

- 749 64. Nakano Y, Hisaeda H, Sakai T, Ishikawa H, Zhang M, Maekawa Y, Zhang T, Takashima M,  
750 Nishitani M, Good RA, Himeno K. 2002. Roles of NKT cells in resistance against infection with  
751 *Toxoplasma gondii* and in expression of heat shock protein 65 in the host macrophages.  
752 *Microbes Infect* 4:1-11.
- 753 65. Paludan SR. 1998. Interleukin-4 and interferon-gamma: the quintessence of a mutual  
754 antagonistic relationship. *Scand J Immunol* 48:459-68.
- 755 66. De Togni P, Goellner J, Ruddle NH, Streeter PR, Fick A, Mariathasan S, Smith SC, Carlson R,  
756 Shornick LP, Strauss-Schoenberger J, et al. 1994. Abnormal development of peripheral  
757 lymphoid organs in mice deficient in lymphotoxin. *Science* 264:703-7.
- 758 67. Kang H, Remington JS, Suzuki Y. 2000. Decreased resistance of B cell-deficient mice to  
759 infection with *Toxoplasma gondii* despite unimpaired expression of IFN-gamma, TNF-alpha,  
760 and inducible nitric oxide synthase. *J Immunol* 164:2629-34.
- 761 68. Schluter D, Deckert M, Hof H, Frei K. 2001. *Toxoplasma gondii* infection of neurons induces  
762 neuronal cytokine and chemokine production, but gamma interferon- and tumor necrosis  
763 factor-stimulated neurons fail to inhibit the invasion and growth of *T. gondii*. *Infect Immun*  
764 69:7889-93.
- 765 69. Zhu W, Li J, Pappoe F, Shen J, Yu L. 2019. Strategies Developed by *Toxoplasma gondii* to  
766 Survive in the Host. *Front Microbiol* 10:899.
- 767 70. Virgen-Slane R, Correa RG, Ramezani-Rad P, Steen-Fuentes S, Detanico T, DiCandido MJ, Li J,  
768 Ware CF. 2020. Cutting Edge: The RNA-Binding Protein Ewing Sarcoma Is a Novel Modulator  
769 of Lymphotoxin beta Receptor Signaling. *J Immunol* 204:1085-1090.
- 770 71. Chen TJ, Kotecha N. 2014. Cytobank: providing an analytics platform for community  
771 cytometry data analysis and collaboration. *Curr Top Microbiol Immunol* 377:127-57.

772

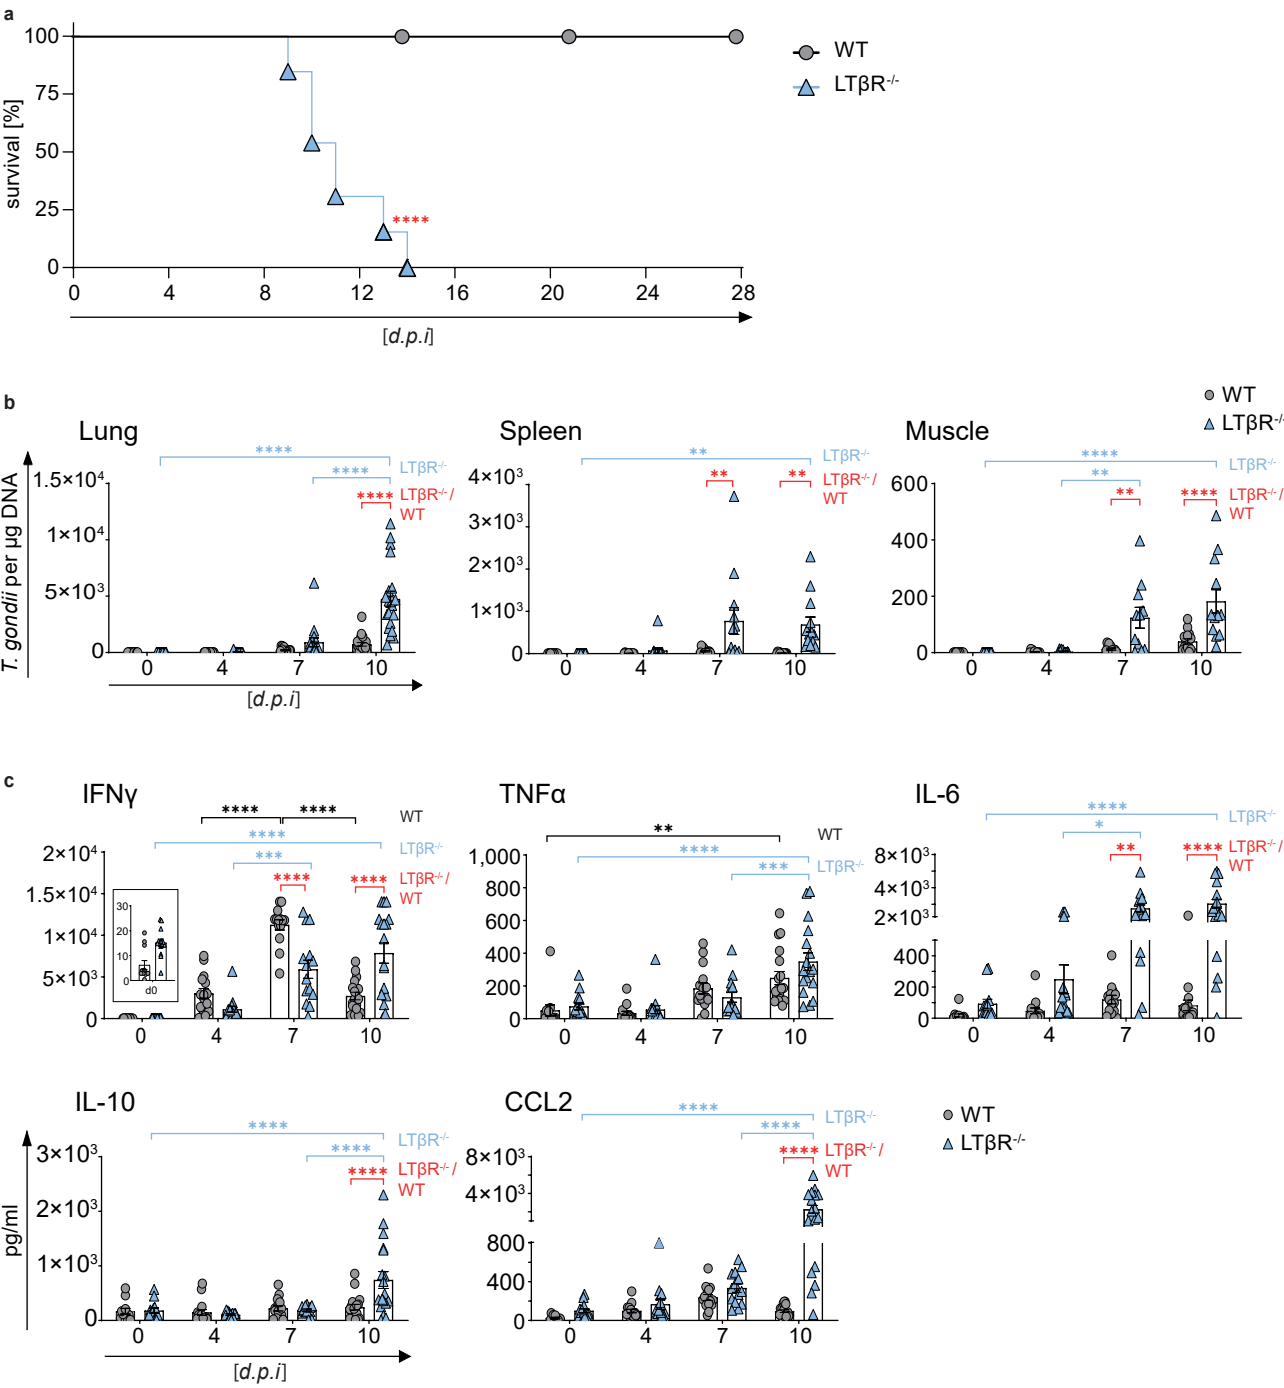

**Fig. 1 |  $LT\beta R^{-/-}$  mice show increased parasite load and dysregulated cytokine expression.** **a**, survival of *T. gondii* infected (ME49, 40 cysts, *i.p.*) WT (n=15) and  $LT\beta R^{-/-}$  (n=13) mice. **b**, qRT-PCR analysis of *T. gondii* DNA (assessing parasite load) in lung, spleen and muscle tissue of uninfected (d0) and *T. gondii* infected WT and  $LT\beta R^{-/-}$  mice (d0 - 7: n $\geq$ 12, d10: n $\geq$ 14). Expression of **c**, IFN $\gamma$ , TNF $\alpha$ , IL-6, IL-10 and CCL2 in the serum of uninfected and *T. gondii* infected WT and  $LT\beta R^{-/-}$  mice (d0 - 7: n $\geq$ 12, d10: n=18) analyzed via bead-based immunoassay. Data shown represent at least three independent experiments; symbols represent individual animals, columns represent mean values and error bars represent  $\pm$  SEM. A log rank (Mantel Cox) test was used for statistical analysis represented in **a**. 2way ANOVA corrected for multiple comparison by the Tukey's post hoc test was used for statistical analysis represented in **b** and **c**. \*P<0.0332, \*\*P<0.0021, \*\*\*P<0.0002 and \*\*\*\*P<0.0001.

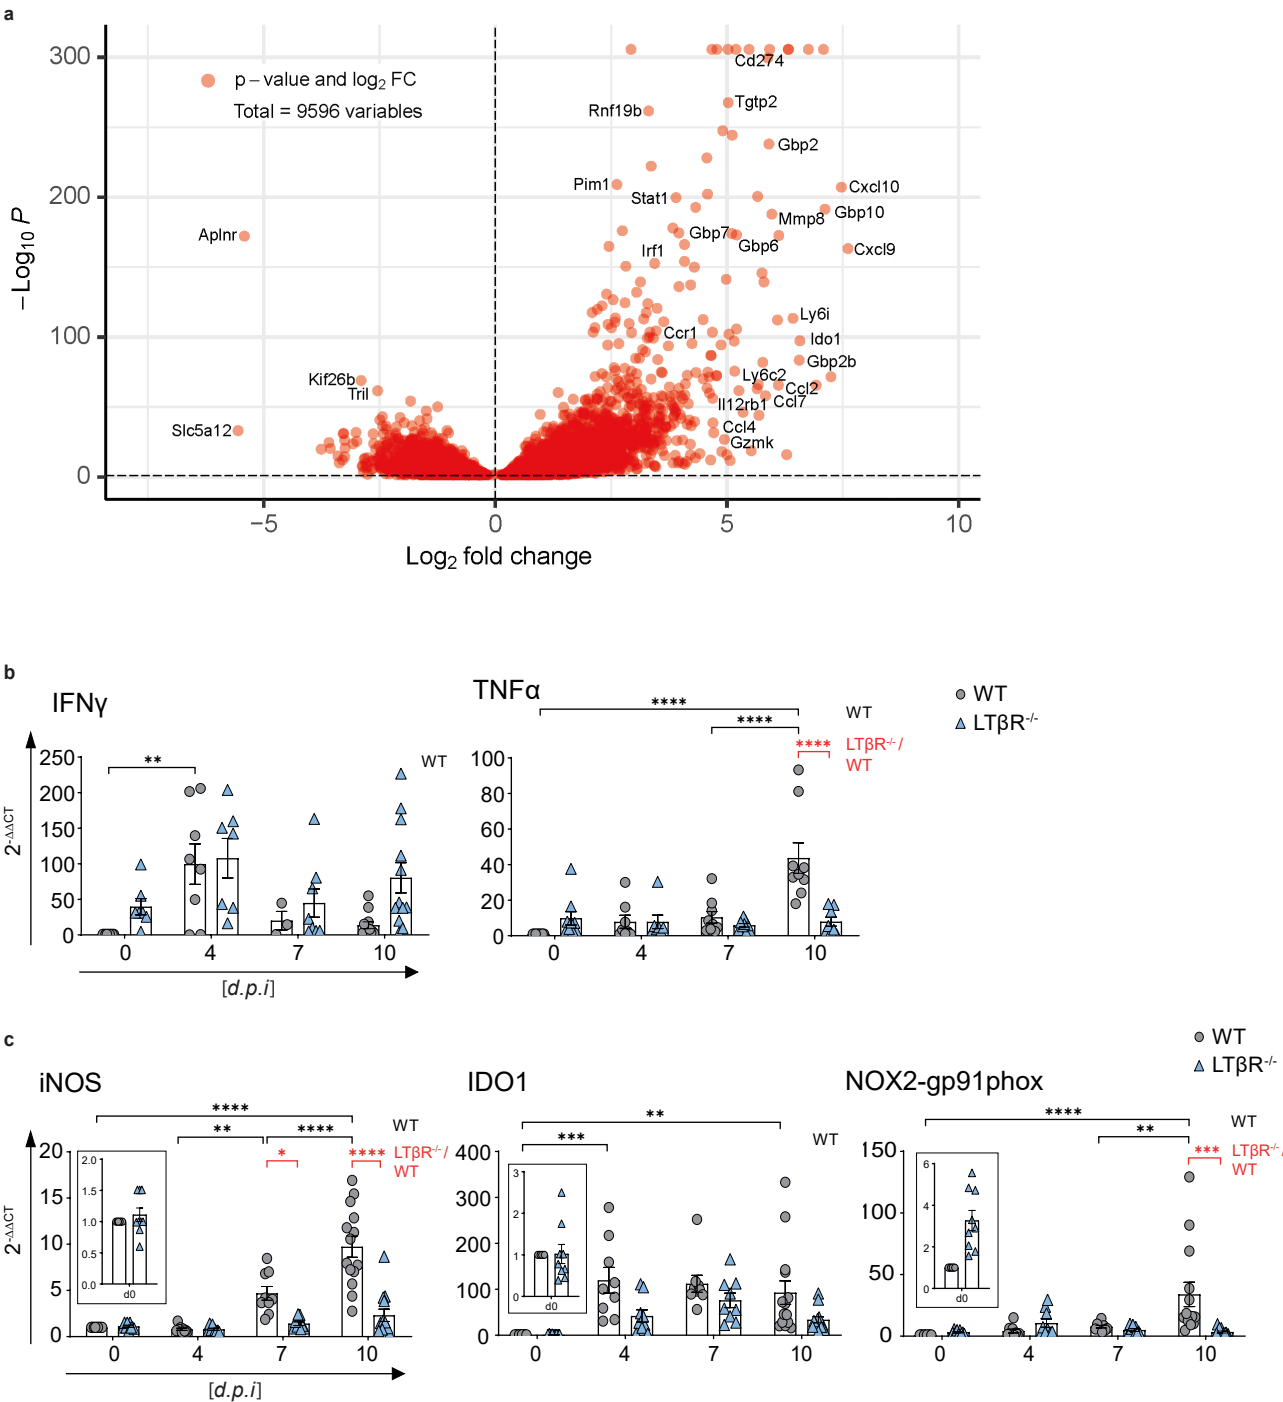

**Fig. 2 | Lungs of  $LT\beta R^{-/-}$  mice show altered transcriptome after *T. gondii* infection.** **a**, volcano plot showing RNAseq data of lung tissue of infected WT mice correlated to infected  $LT\beta R^{-/-}$  mice (d7 *p.i.*;  $n=3$ /group). Dashed horizontal black line represents an adjusted p-value of 0.1 (“Wald” test). qRT-PCR analysis of **b**, cytokines (IFN $\gamma$  and TNF $\alpha$ ) and **c**, host effector molecules (iNOS, IDO1, NOX2-gp91phox) in lung tissue from uninfected (d0) and *T. gondii* infected (ME49, 40 cysts *i.p.*) WT and  $LT\beta R^{-/-}$  mice (d0 - 7:  $n\geq 12$ , d10:  $n\geq 14$ ; exception: IFN $\gamma$   $n\geq 3$ , d0 - 10 *p.i.*). Data shown in **b** & **c** represent four independent experiments; symbols represent individual animals, columns represent mean values and error bars represent  $\pm$  SEM. 2way ANOVA corrected for multiple comparison by the Tukey’s post hoc test was used for statistical analysis. \* $P<0.0332$ , \*\* $P<0.0021$ , \*\*\* $P<0.0002$  and \*\*\*\* $P<0.0001$ .

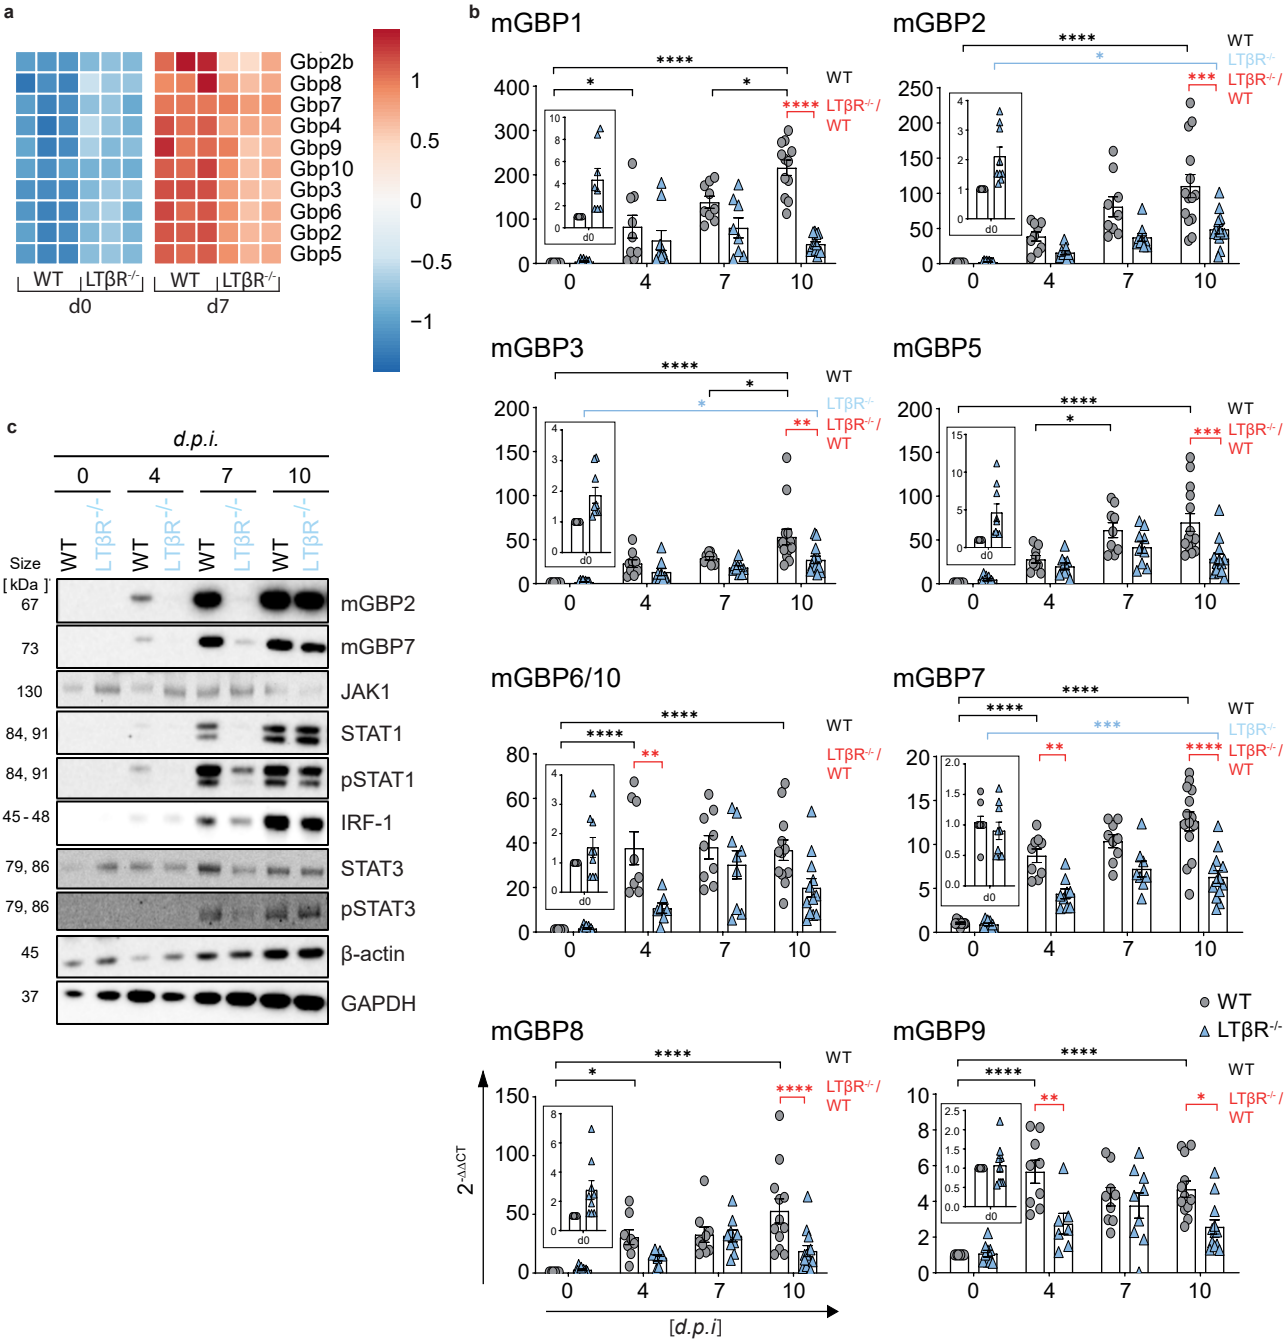

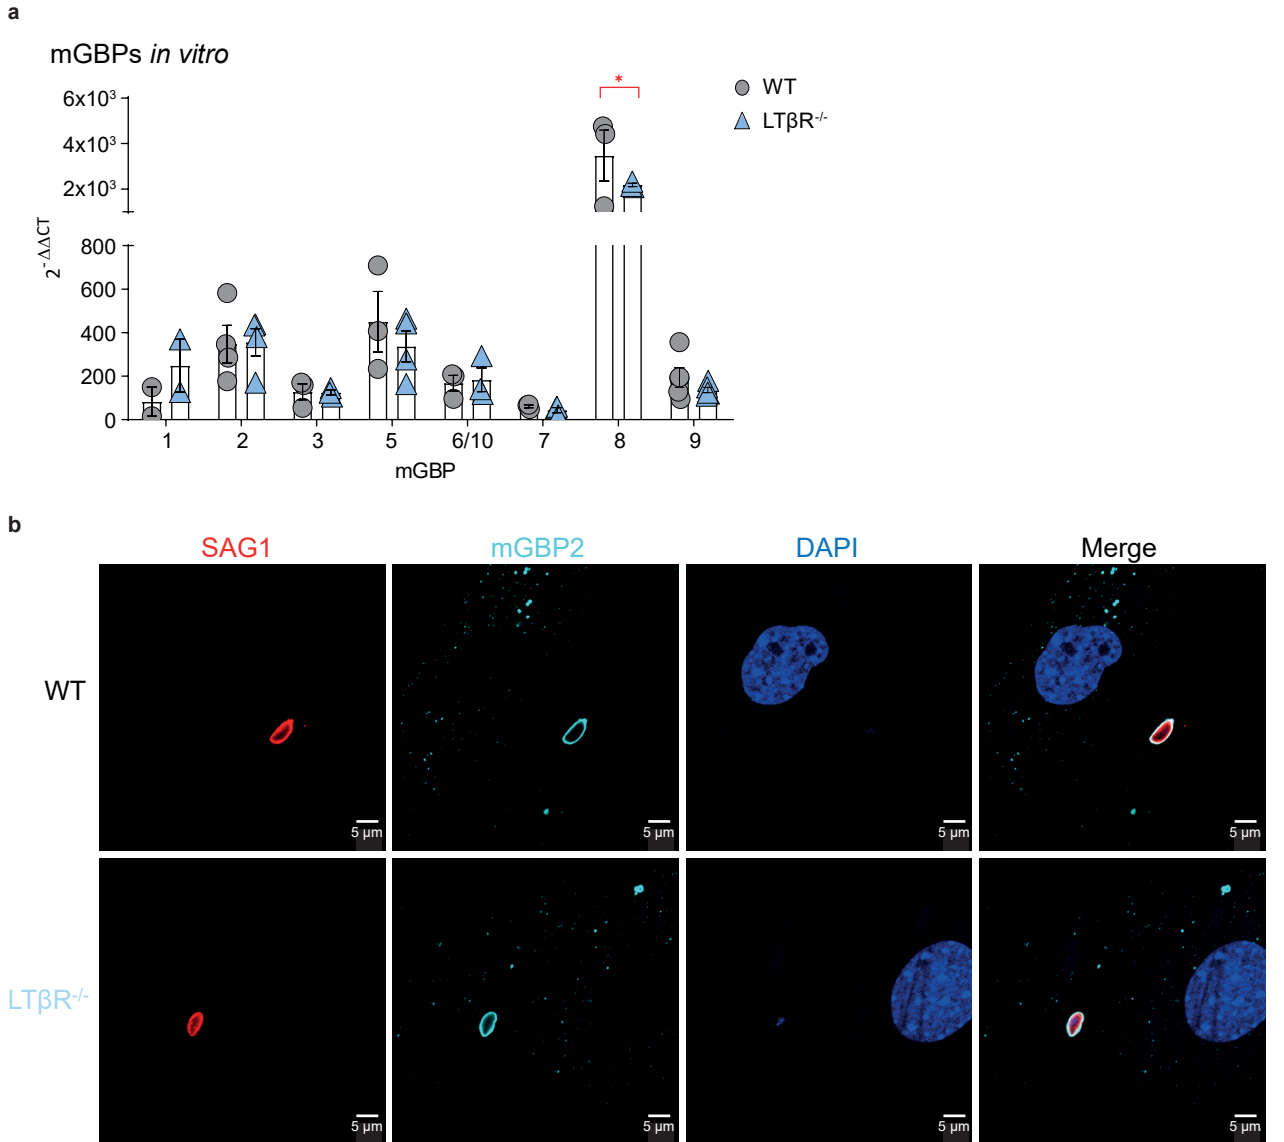

**Fig. 4 | mGBP upregulation and recruitment.** **a**, qRT-PCR analysis of mGBP mRNAs expression of uninfected WT and LTβR<sup>-/-</sup> MEFs stimulated with IFNγ (7.5 ng/ml) for 8h (all n=3, except for mGBP1 where n=2). Each symbol represents an individual technical replicate; columns represent mean values and error bars represent ± SEM. 2way ANOVA corrected for multiple comparisons by the Sidak post hoc test was used for statistical analysis. \*P<0.00332. **b**, Representative immunofluorescence analysis of *T. gondii* tachyzoite (MOI 1:40) infected WT and LTβR<sup>-/-</sup> MEFs. Cells were prestimulated with IFNγ [7.5 ng/ml] for 16h before infected with *T. gondii* tachyzoites for 2h. *T. gondii* surface antigen SAG1 was visualized using a Cy3-conjugated and mGBP2 using an Alexa Fluor 633-conjugated secondary antibody for detection of mGBP2 recruitment towards the *T. gondii* PV. Cell nuclei were stained using DAPI. Data shown in **a** & **b** represent at least two independent experiments.



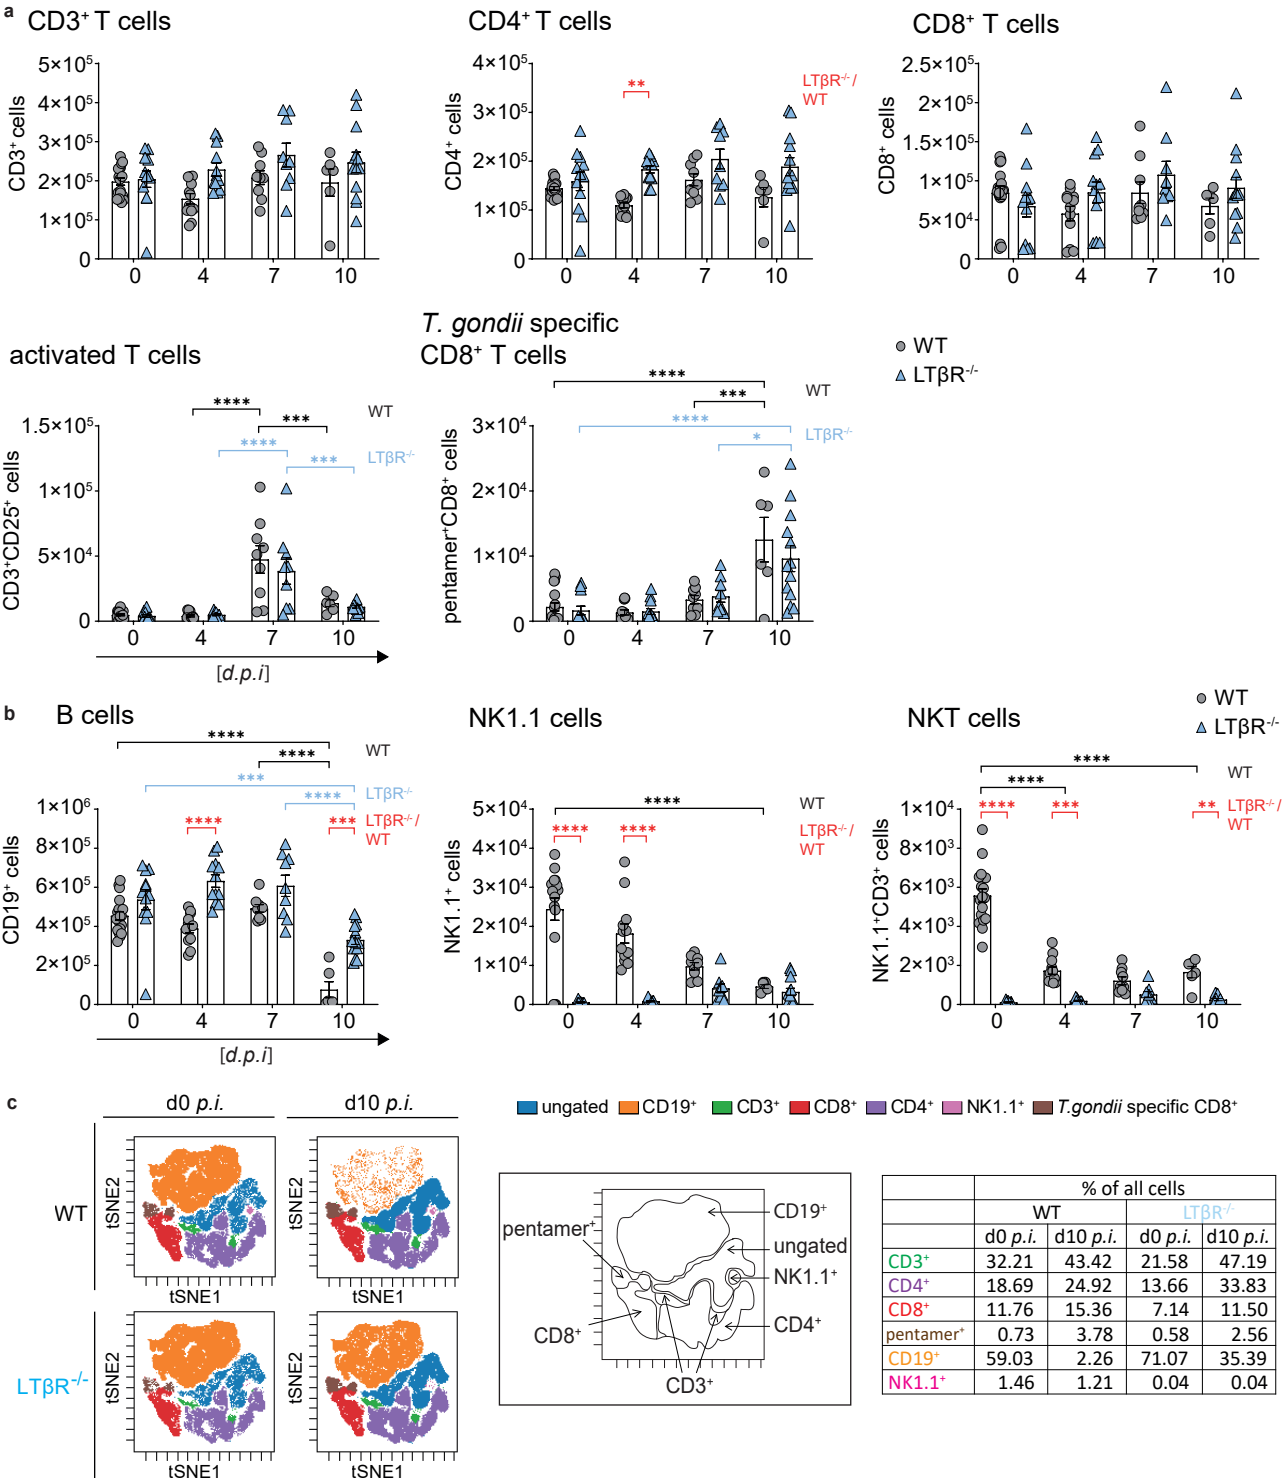

**Fig. 5 | Dysregulated immune cell numbers in *LTβR*<sup>-/-</sup> mice.** **a**, Absolute cell numbers of CD3<sup>+</sup>, CD4<sup>+</sup>, CD8<sup>+</sup>, CD25<sup>+</sup>CD3<sup>+</sup> and pentamer<sup>+</sup>CD8<sup>+</sup> T cells and **b**, CD19<sup>+</sup>, NK1.1<sup>+</sup> and NK1.1<sup>+</sup>CD3<sup>+</sup> cells in spleens of uninfected (d0) and *T. gondii* infected (ME49, 40 cysts, *i.p.*) WT and *LTβR*<sup>-/-</sup> mice (d0 – 7 *p.i.*: n=12, d10 *p.i.*: n≥6) determined via flow cytometry. **c**, Representative tSNE plots from splenocytes of uninfected and *T. gondii* infected (d10 *p.i.*) WT and *LTβR*<sup>-/-</sup> mice. Clustered populations were identified using the indicated markers. Data shown represent at least three independent experiments; symbols represent individual animals, columns represent mean values and error bars represent ± SEM. 2way ANOVA corrected for multiple comparison by the Tukey's post hoc test was used for statistical analysis represented in **a** and **b**. \*P<0.0332, \*\*P<0.0021, \*\*\*P<0.0002 and \*\*\*\*P<0.0001.



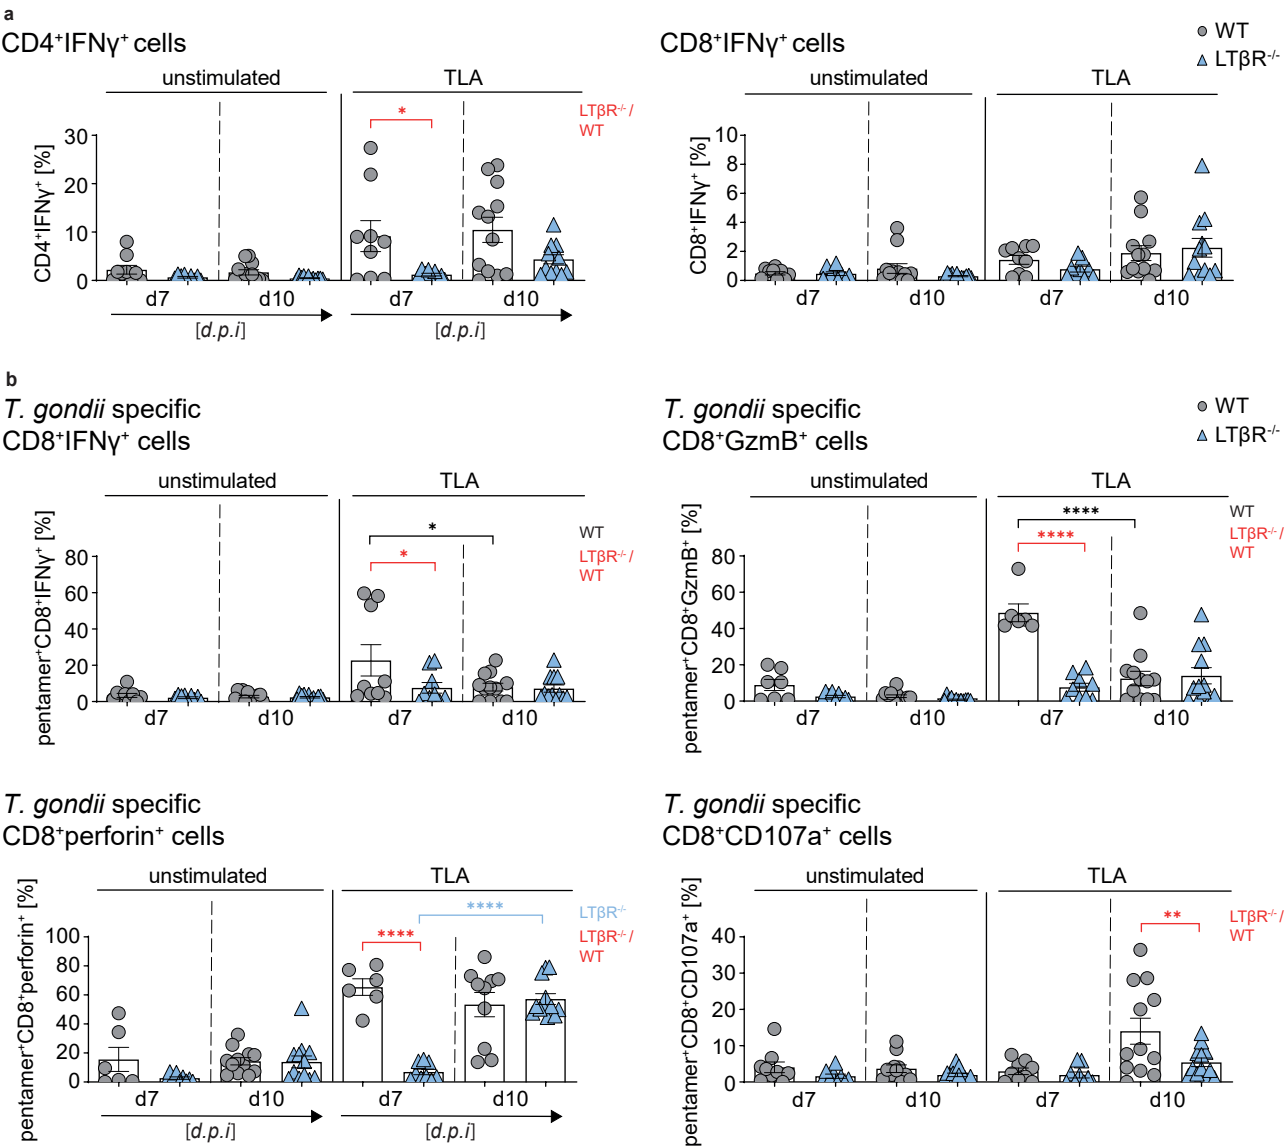

**Fig. 6 | LT $\beta$ R deficiency impairs T cell effector function in the spleen.** Intracellular staining of **a**, CD4<sup>+</sup>IFN $\gamma$ <sup>+</sup> and CD8<sup>+</sup>IFN $\gamma$ <sup>+</sup> T cells [%] and **b**, cytotoxic granule (GzmB<sup>+</sup> or perforin<sup>+</sup>) containing and degranulating (CD107a<sup>+</sup>) pentamer<sup>+</sup>CD8<sup>+</sup> T cells of unstimulated and toxoplasma lysate antigen (TLA) *ex vivo* restimulated splenocytes from *T. gondii* infected (d7 and 10 p.i.) WT and LT $\beta$ R<sup>-/-</sup> mice (d7: n $\geq$ 6, d10: n $\geq$ 10). Representative data of at least two independent experiments; symbols represent individual animals, columns represent mean values and error bars represent  $\pm$  SEM. 2way ANOVA corrected for multiple comparison by the Tukey's post hoc test was used for statistical analysis. \*P<0.0332, \*\*P<0.0021, \*\*\*\*P<0.0001.

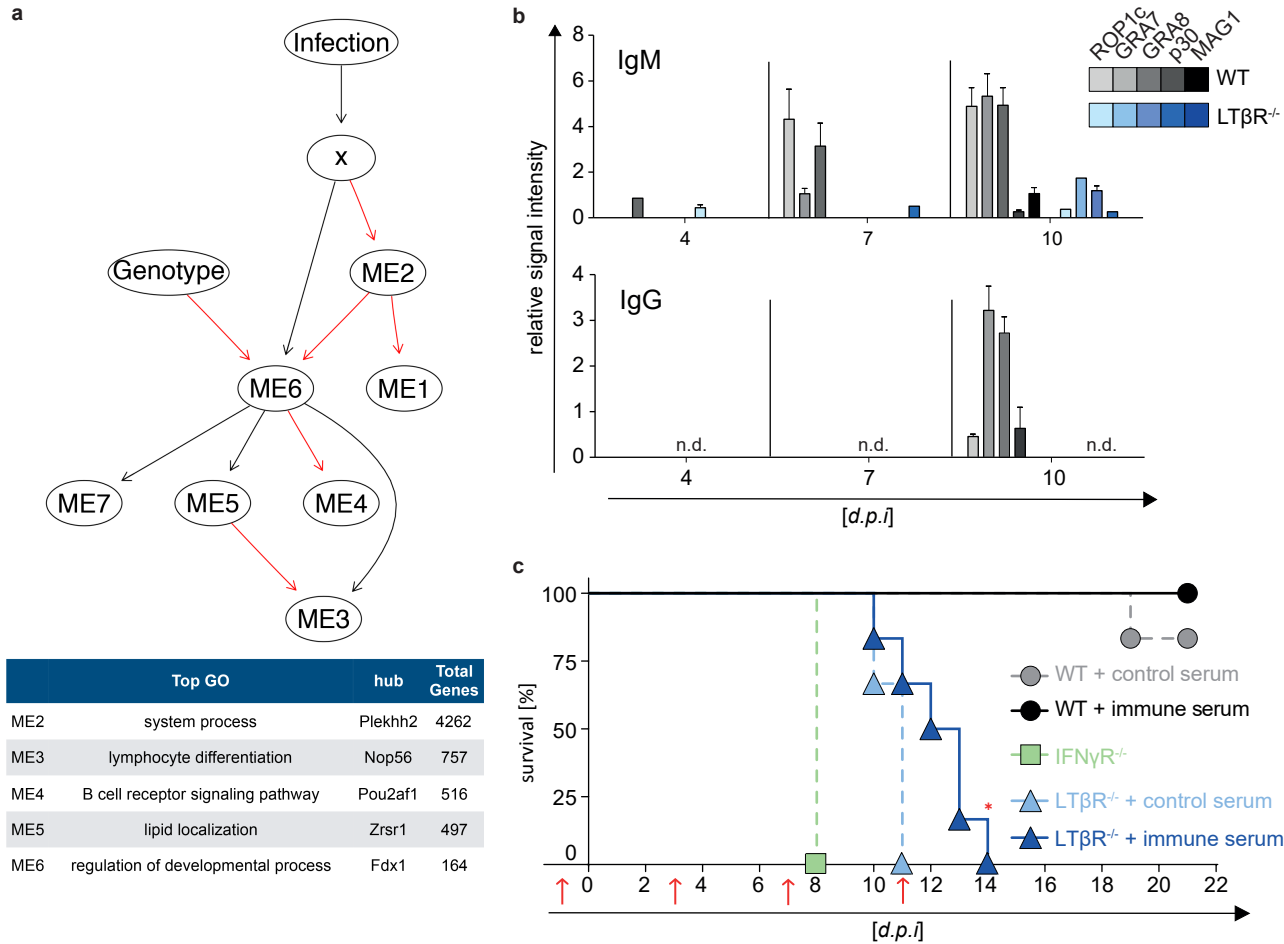

**Fig. 7 | Abrogated parasite specific isotype class switching and reconstitution of mice with *T. gondii* specific immune serum.** **a**, Host-pathogen network prediction model generated on RNAseq data of lung tissue of uninfected (d0) and *T. gondii* infected (ME49, 40 cysts; d7 *p.i.*) WT and  $LT\beta R^{-/-}$  mice ( $n=3/\text{group}$ ). GmicR was used to detect relationships between module eigengenes (ME) and experimental conditions. *x* represents total *T. gondii* gene expression data for each sample, infection and genotype were included as variables. Red lines indicate inverse and black lines positive relationships. Representative gene ontologies and hub genes reported by GmicR for each module are shown in the summary table. **b**, *T. gondii* specific IgM and IgG antibody response in serum of uninfected (d0) and *T. gondii* infected (ME49, 40 cysts *i.p.*) WT and  $LT\beta R^{-/-}$  mice (d4 and d7 *p.i.*;  $n=15$ , d10 *p.i.*:  $n\geq 20$ ). Shown is a representative result of four independent experiments, bars represent mean values  $\pm$  SEM. **c**, Transfer of serum (red arrows; d-1, 3, 7 and 11 *p.i.*) from uninfected donor WT mice (control serum) or from *T. gondii* infected (ME49, 20 cysts, *i.p.*) donor WT mice (immune serum) into WT and  $LT\beta R^{-/-}$  acceptor mice. On day 0, acceptor mice ( $n=6/\text{group}$ ) were infected with *T. gondii* (ME49, 10 cysts, *i.p.*) and survival was evaluated.  $IFN\gamma R^{-/-}$  mice ( $n=3$ ) served as infection controls. Data shown in **c** represent one experiment. A log rank (Mantel Cox) test was used for statistical analysis represented in **c**. \* $P<0.0332$  and n.d.= not detected.
